# Supplementary material
Source: PubMed Central journal article supplement (PMC7474267)
Supplement: mmc1.pdf [file mmc1.pdf]

**YMTHE, Volume 28**

## **Supplemental Information**

### **Correction of Three Prominent Mutations in Mouse and Human Models of Duchenne Muscular Dystrophy by Single-Cut Genome Editing**

**Yi-Li Min, Francesco Chemello, Hui Li, Cristina Rodriguez-Caycedo, Efrain Sanchez-Ortiz, Alex A. Mireault, John R. McAnally, John M. Shelton, Yu Zhang, Rhonda Bassel-Duby, and Eric N. Olson**

# Supplemental Information

## Supplementary Figures

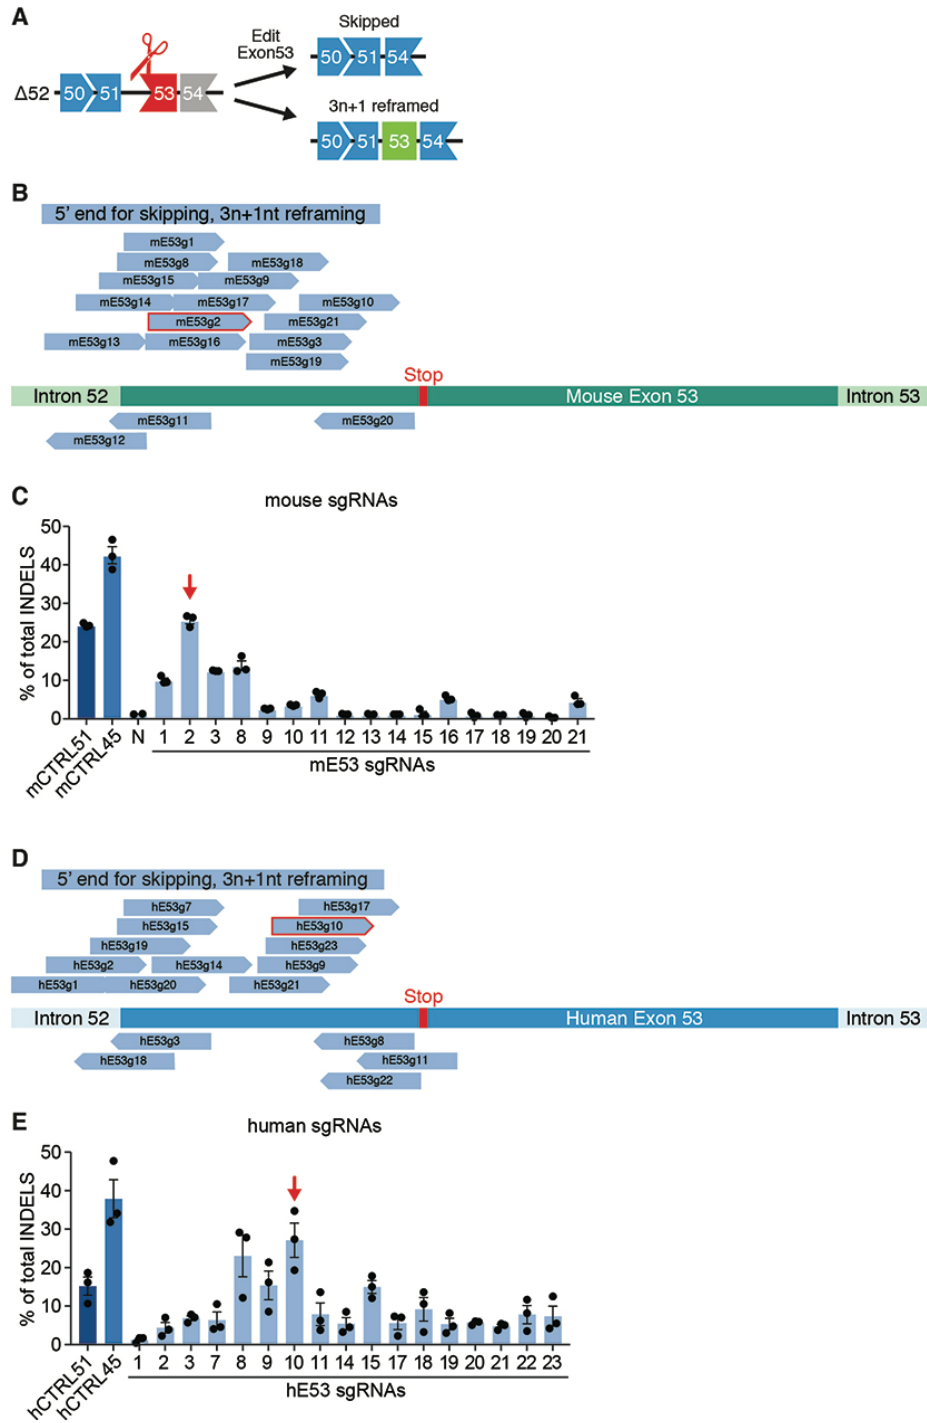

**Figure S1. Gene editing strategy and location of mouse and human exon 53 sgRNAs for  $\Delta 52$  DMD models.** (A) Diagram for exon 53 targeting strategy and potential products after editing. Shapes of intron-exon junctions indicate complementarity that maintains the open reading frame upon splicing. (B) Mouse sgRNA location targeting the 5' region of exon 53. The sgRNAs targeting exon 53 before the stop codon in  $\Delta 52$  mice are candidates for exon skipping or 3n+1 reframing. sgRNA sequences are listed in Table S2. mE53g2, the sgRNA selected for further analyses is bordered in red. (C) Indel analysis of sgRNAs that target exon 53 was performed in N2a mouse cells. Red arrow indicates the most efficient sgRNA which was used for further analyses. mCTRL51 and mCTRL45 are positive validated sgRNA controls targeting mouse exon 51 and exon 45, respectively<sup>18, 19</sup> (n = 3 biological replicates). (D) Human sgRNA location for targeting the 5' region of exon 53. The sgRNAs targeting exon 53 before the stop codon in human  $\Delta 52$  iPSCs are candidates for exon skipping or 3n+1 reframing. sgRNA sequences are listed in Table S2. hE53h10, the sgRNA selected for further analyses is bordered in red. (E) Indel analysis of sgRNAs that target exon 53 was performed in 293T human cells. Red arrow indicates the most efficient sgRNA used for further analyses. hCTRL51 and hCTRL45 are positive validated sgRNA controls targeting human exon 51 and exon 45, respectively<sup>18, 19</sup> (n = 3 biological replicates). Data are presented as means  $\pm$  SEM.

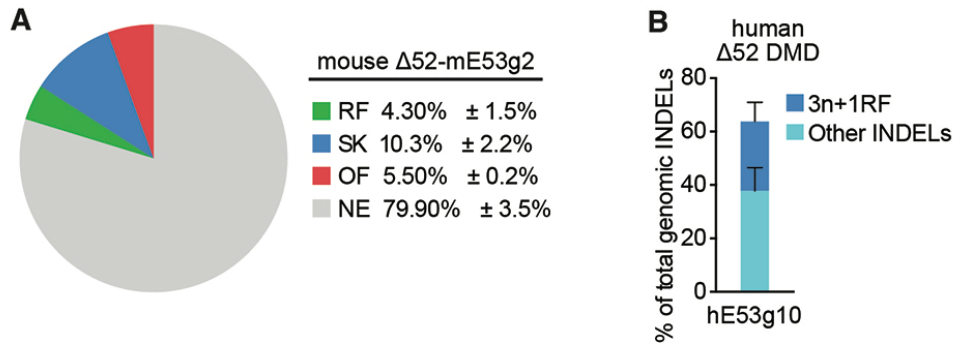

**Figure S2. Correction events of mouse and human models after editing of exon 53 in mouse and human  $\Delta 52$  DMD models.** (A) Pie chart showing percentage of events detected in mouse TA muscle at exon 53 after ssAAV-Cas9 and scAAV-mE53g2 treatment using TIDE analysis of the RT-PCR sequences (n=3). RT-PCR products were divided into four groups: Not edited (NE), exon 53 skipped (SK), exon 53 reframed (RF), and out of frame (OF). (B) INDEL genomic analysis of hE53g10 targeting exon 53 in human  $\Delta 52$  DMD iPSCs (n=3). 3n+1 reframing (RF) events restore the correct open reading frame. Data are presented as means  $\pm$  SEM

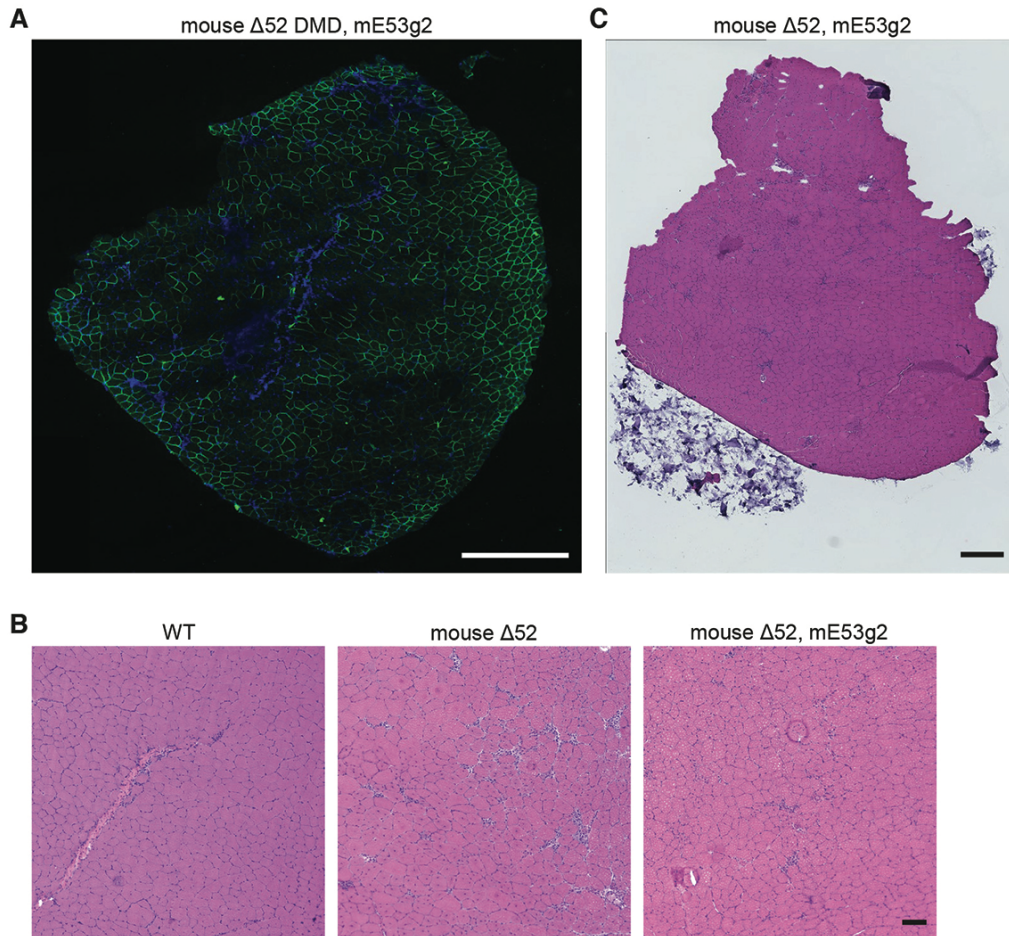

**Figure S3. Intramuscular AAV9 delivery of gene editing components rescues dystrophin expression in  $\Delta 52$  DMD mice.** (A) Dystrophin immunohistochemistry of TA muscle in corrected  $\Delta 52$  DMD mice 3 weeks after ssAAV-Cas9 and scAAV-mE53g2 intramuscular injection ( $5 \times 10^{10}$  vg/leg of ssAAV9-Cas9 and  $5 \times 10^{10}$  vg/leg of scAAV-mE53g2). Dystrophin is shown in green. Nuclei are marked by DAPI stain in blue. Tile scan (10X) of the entire TA muscle. Scale bar is 500  $\mu\text{m}$ . (B) H&E staining of TA in WT,  $\Delta 52$  DMD, and corrected  $\Delta 52$  DMD mice 3 weeks after ssAAV-Cas9 and scAAV-mE53g2 intramuscular injection ( $5 \times 10^{10}$  vg/leg of ssAAV9-Cas9 and  $5 \times 10^{10}$  vg/leg of scAAV-mE53g2). Scale bar is 100  $\mu\text{m}$ . (C) Whole muscle scanning of H&E staining of TA of WT,  $\Delta 52$  DMD and corrected  $\Delta 52$ . Tile scan (4X) of the entire muscle. Scale bar is 500  $\mu\text{m}$ .

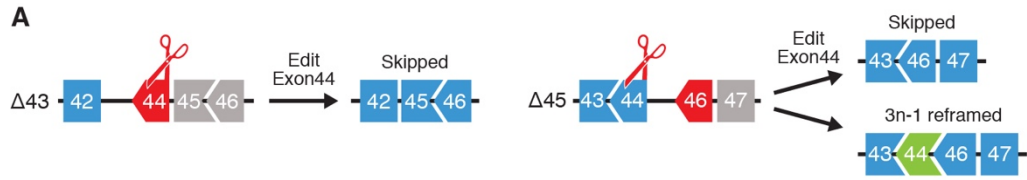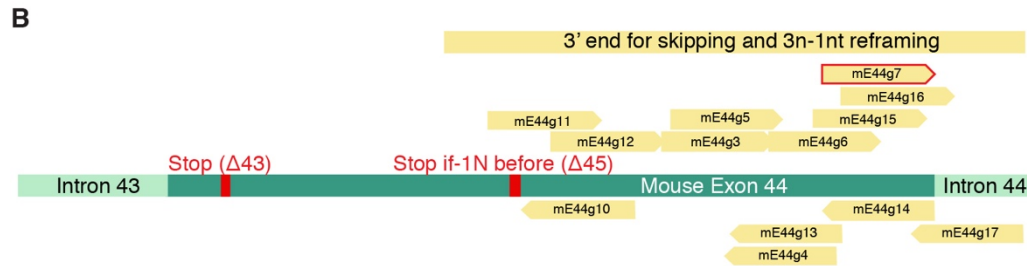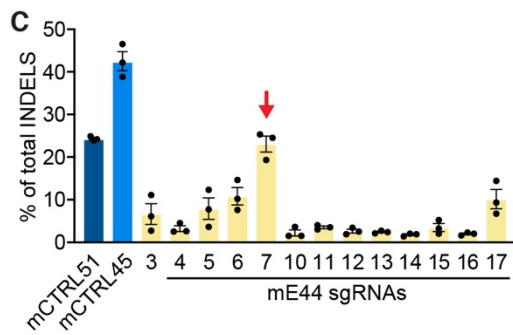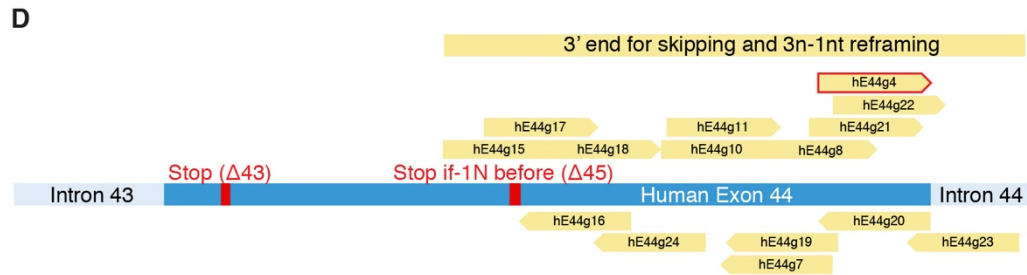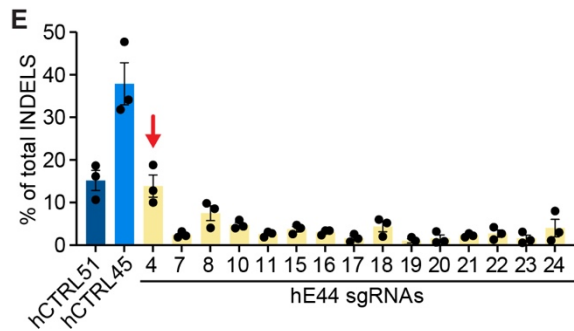

**Figure S4. Gene editing strategy and location of mouse and human exon 44 sgRNAs for  $\Delta 43$  and  $\Delta 45$  DMD models.** (A) Diagram for exon 44 targeting strategy and potential products after editing in  $\Delta 43$  and  $\Delta 45$  DMD models. Shapes of intron-exon junctions indicate complementarity that maintains the open reading frame upon splicing. (B) Mouse sgRNAs targeting the 3' region of exon 44. The sgRNAs targeting exon 44 are candidates for exon skipping (in  $\Delta 43$  DMD mice) or exon skipping and 3n+1 reframing (in  $\Delta 45$  DMD). sgRNA sequences are listed in Table S2. mE44g7, the sgRNA selected for further analyses is bordered in red. (C) Indel analysis of sgRNAs that target exon 44 was performed in N2a mouse cells. Red arrow indicates the most efficient sgRNA which was used for further analyses. mCTRL51 and mCTRL45 are positive validated sgRNA controls targeting, respectively, mouse exon 51 and exon 45<sup>18, 19</sup> (n = 3 biological replicates). (D) Human sgRNA location for targeting the 3' region of exon 44. The sgRNAs targeting exon 44 are candidates for exon skipping (in human  $\Delta 43$  DMD) or exon skipping and 3n+1 reframing (in human  $\Delta 45$  DMD). sgRNA sequences are listed in Table S2. hE44g4, the sgRNA selected for further analyses is bordered in red. (E) Indel analysis of sgRNAs that target exon 44 was performed in 293T human cells. Red arrow indicates the most efficient sgRNA used for the further analyses. hCTRL51 and hCTRL45 are positive validated sgRNA controls targeting, respectively, human exon 51 and exon 45<sup>18, 19</sup> (n = 3 biological replicates). Data are presented as means  $\pm$  SEM

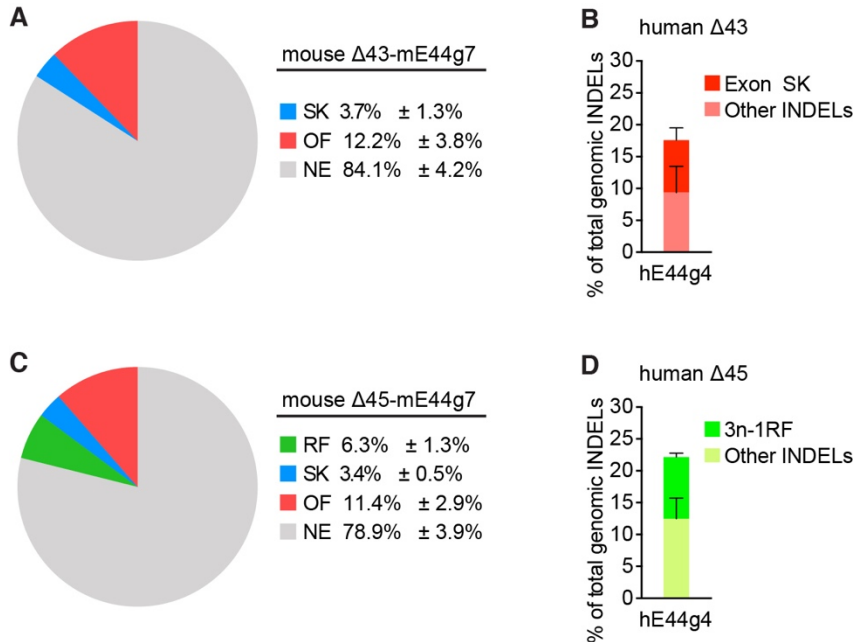

**Figure S5. Correction events after gene editing of exon 44 in mouse and human  $\Delta 43$  and  $\Delta 45$  DMD models.** (A, C) Pie charts showing percentage of events detected in  $\Delta 43$  and  $\Delta 45$  DMD mouse TA muscles after ssAAV-Cas9 and scAAV-mE44g7 treatment using TIDE analysis of the RT-PCR sequences (A: n=3; C: n=2). RT-PCR products were divided into four groups: Not edited (NE), exon 44 skipped (SK), exon 44 reframed (RF), and out of frame (OF). (B, D) INDEL genomic analysis of hE44g4 targeting exon 44 in human  $\Delta 43$  and  $\Delta 45$  DMD iPSCs (n=3). Exon 44 skipping (SK) restores the correct open reading frame in human  $\Delta 43$  DMD. 3n-1 reframing (RF) events restore the correct open reading frame in  $\Delta 45$ . Data are presented as means  $\pm$  SEM



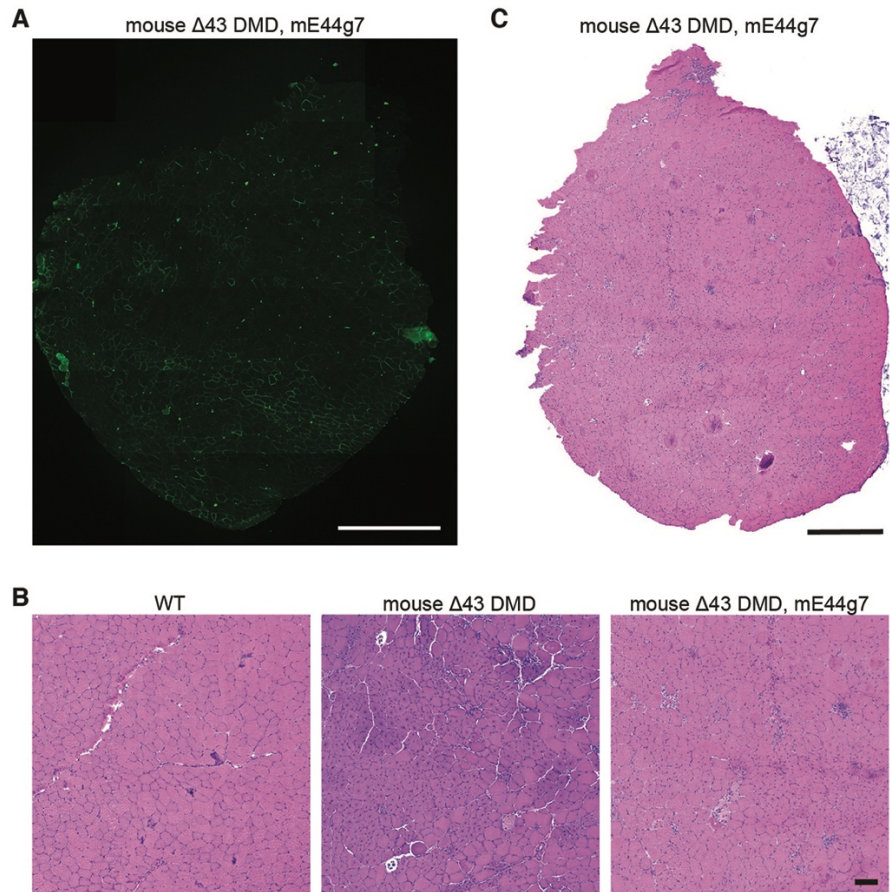

**Figure S6. Intramuscular AAV9 delivery of gene editing components restores dystrophin expression in  $\Delta 43$  DMD mice.** (A) Dystrophin immunohistochemistry of TA muscle in corrected  $\Delta 43$  DMD mice 3 weeks after ssAAV-Cas9 and scAAV-mE44g7 intramuscular injection ( $5 \times 10^{10}$  vg/leg of ssAAV9-Cas9 and  $5 \times 10^{10}$  vg/leg of scAAV-mE44g7). Dystrophin is shown in green. Nuclei are marked by DAPI stain in blue. Tile scan (10X) of the entire TA muscle. Scale bar is 500  $\mu\text{m}$ . (B) H&E staining of TA muscles in WT,  $\Delta 43$  DMD, and corrected  $\Delta 43$  mice 3 weeks after ssAAV-Cas9 and scAAV-mE44g7 intramuscular injection ( $5 \times 10^{10}$  vg/leg of ssAAV9-Cas9 and  $5 \times 10^{10}$  vg/leg of scAAV-mE44g7). Scale bar is 100  $\mu\text{m}$ . (C) Whole muscle scanning of H&E staining of TA of corrected m $\Delta 43$ . Tile scan (4X) of the entire muscle. Scale bar is 500  $\mu\text{m}$ .

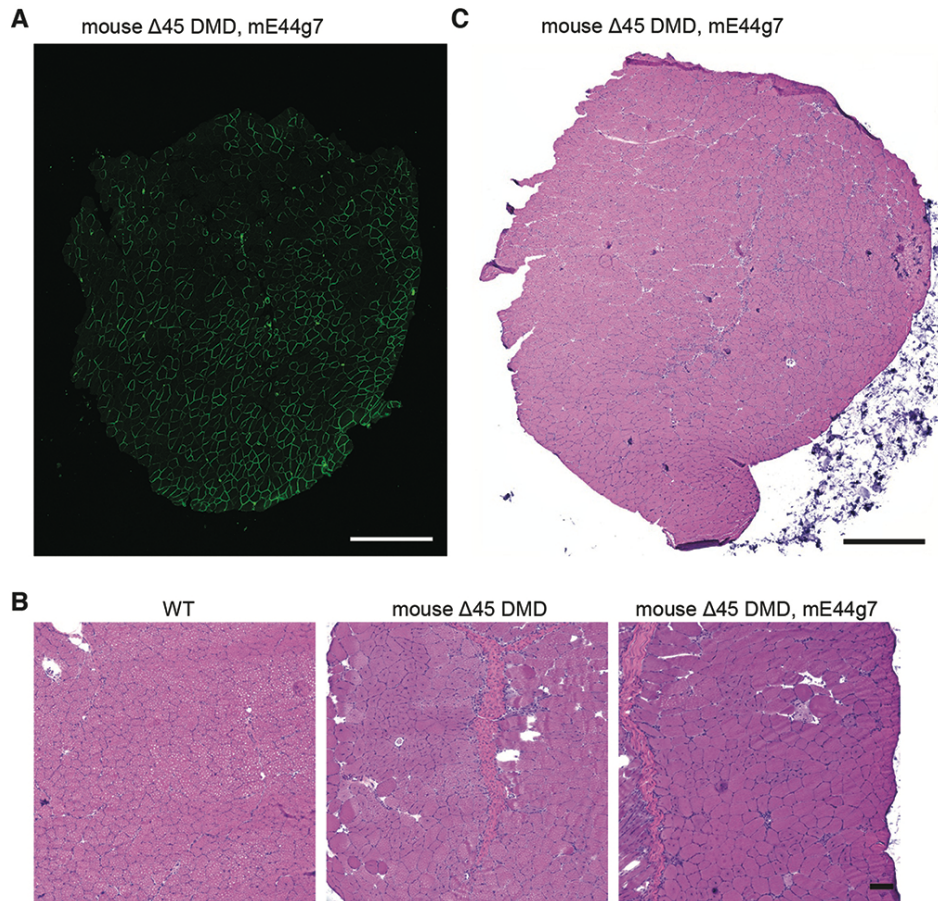

**Figure S7. Intramuscular AAV9 delivery of gene editing components restores dystrophin expression in  $\Delta 45$  DMD mice.** (A) Dystrophin immunohistochemistry of TA muscle in corrected  $\Delta 45$  DMD mice 3 weeks after ssAAV-Cas9 and scAAV-mE44g7 intramuscular injection ( $5 \times 10^{10}$  vg/leg of ssAAV9-Cas9 and  $5 \times 10^{10}$  vg/leg of scAAV-mE44g7). Dystrophin is shown in green. Nuclei are marked by DAPI stain in blue. Tile scan (10X) of the entire TA muscle. Scale bar is 500  $\mu$ m. (B) H&E staining of TA in WT,  $\Delta 45$  DMD, and corrected DMD mice 3 weeks after ssAAV-Cas9 and scAAV-mE44g7 intramuscular injection ( $5 \times 10^{10}$  vg/leg of ssAAV9-Cas9 and  $5 \times 10^{10}$  vg/leg of scAAV-mE44g7). Scale bar is 100  $\mu$ m. (C) Whole muscle scanning of H&E staining of TA muscles of corrected  $\Delta 45$  DMD mice. Tile scan (4X) of the entire muscle. Scale bar is 500  $\mu$ m.

## Supplementary Tables

**Table S1. List of sgRNAs used to generate DMD mouse models and primers.**

| DMD model generation                                                            |                       |                              |
|---------------------------------------------------------------------------------|-----------------------|------------------------------|
| Purpose of the primers                                                          | ID                    | Sequence (5'-3')             |
| Primers for sgRNA targeting Dmd exon 43 to generate the $\Delta$ Ex43 DMD model | mDmd-Ex43-N2-Top      | caccgTTATTAGTACTAACTCAGAA    |
|                                                                                 | mDmd-Ex43-N2-Bottom   | aaacTTCTGAGTTAGTACTAATAAc    |
|                                                                                 | mDmd-Ex43-C2-Top      | caccgGTAAATATCAACTTCTAAAT    |
|                                                                                 | mDmd-Ex43-C2-Bottom   | aaacATTTAGAAAGTTGATATTTACc   |
| Primers for sgRNA targeting Dmd exon 45 to generate the $\Delta$ Ex45 DMD model | mDmd-Exon45-5-G1-top  | CACCGaactaatatatacctaaataact |
|                                                                                 | mDmd-Exon45-5-G1-bot  | AAACAGTATTTGGATATATTAGTT C   |
|                                                                                 | mDmd-Exon45-3-G4-top  | CACCGagtttggtgctaaaaatcatg   |
|                                                                                 | mDmd-Exon45-3-G4-bot  | AAACCATGATTTTTTAGCACAAACT C  |
| Primers for sgRNA targeting Dmd exon 52 to generate the $\Delta$ Ex52 DMD model | mDmd-Ex52-N1-Top      | CACCGatataatcttaaatgatgtat   |
|                                                                                 | mDmd-Ex52-N1-bottom   | AAACATACATCATTTAAGATATATC    |
|                                                                                 | mDmd-Ex52-C3-Top      | caccgccaagttaatcaaattggttc   |
|                                                                                 | mDmd-Ex52-C3-Bottom   | aaacGAACAATTTGATTAACCTGGc    |
| PCR, RT-PCR and TIDE analysis                                                   |                       |                              |
| For mouse dE43, skipping exon 44                                                | mDmd-dE43-E4146-RT-R2 | CTGCTGCTCATCTCCAAGTG         |
|                                                                                 | mDmd-dE43-E4246-RT-F3 | AGTGACGACTGAAGATATGCCT       |
| For mouse dE45, skipping/reframing exon44                                       | mDmd-E4347-RT-F2      | AGGTGAAAGTACAGGAAGCCGT       |
|                                                                                 | mDmd-E4347-RT-R2      | CTTCTGGCCTTATGGGAGCACT       |
| For mouse dE52, skipping or reframe exon 53                                     | mDmd-E5054-RT-R1      | TGACGGAGGTCTTTGGCCAA         |
|                                                                                 | mDmd-E5155-RT-F1      | TTGGAGGTACCTGCACTGGC         |
| For human dE43, skipping exon 44                                                | hEx42-RT-F            | GCCCTATTAGAAGTGAACAAC        |
|                                                                                 | hEx46-RT-R            | GGTTCAAGTGGGATACTAGC         |
| For human dE45, skipping/reframing exon44                                       | hEx42-RT-F            | GCCCTATTAGAAGTGAACAAC        |
|                                                                                 | hEx46-RT-R            | GGTTCAAGTGGGATACTAGC         |
| For human dE52, skipping or reframe exon 53                                     | hEx51-RT-F            | GAAACTGCCATCTCCAAACTAGAAA    |
|                                                                                 | hEx54-RT-R            | TCATGTGGACTTTTCTGGTATCATC    |
| For editing mouse Dmd exon 44                                                   | mE44-T7E1-F1          | agggagaagatgctaattatcctaag   |
|                                                                                 | mE44-T7E1-R1          | caaacagtcatagcacaattttcag    |
| For editing mouse Dmd exon 46                                                   | mDmd-sE46-T7E1-F2     | tcttcacaagccccctctta         |
|                                                                                 | mDmd-sE46-T7E1-R1     | Caactggttaggcagtttgcatt      |
| For editing mouse Dmd exon 53                                                   | mDmd-sE53-T7E1-F2     | TGCCACAAGTAAGTGCTGA          |
|                                                                                 | mDmd-sE53-T7E1-R1     | TTGTCTCAAaaccaaccaacc        |
|                                                                                 | hDMD-sE53-T7E1-F1     | gggaaatcaggctgatgggt         |

|                           |                   |                           |
|---------------------------|-------------------|---------------------------|
| For editing human exon 53 | hDMD-sE53-T7E1-R1 | GTCTACTGTTTCATTTTCAGC     |
| For editing human exon 44 | hDMD-sE44-T7E1-F2 | GCAGGAAACTATCAGAGTG       |
|                           | hDMD-sE44-T7E1-R2 | ACACCTTGCTGTTACGAT        |
| For editing human exon 46 | hDMD-sE46-T7E1-F1 | ccaccaaacctggcaaat        |
|                           | hDMD-sE46-T7E1-R1 | GAACTATGAATAACCTAATGGGCAG |

**Table S2. Sequence of sgRNAs.**

| Purpose                       | ID                   | Sequence              | PAM |
|-------------------------------|----------------------|-----------------------|-----|
| Human sgRNA targeting exon 53 | hE53g1               | ATTTATTTTTCCTTTTATTC  | TAG |
|                               | hE53g2               | TTTCCTTTTATTCTAGTTGA  | AAG |
|                               | hE53g3               | TGATTCTGAATTCTTTCAAC  | TAG |
|                               | hE53g7               | TGAAAGAATTCAGAATCAGT  | GGG |
|                               | hE53g8               | ACTGTTGCCTCCGGTTCTGA  | AGG |
|                               | hE53g9               | TACAAGAACACCTTCAGAAC  | CGG |
|                               | hE53g10              | AAGAACACCTTCAGAACCGG  | AGG |
|                               | hE53g11              | TTTCATTCAACTGTTGCCTC  | CGG |
|                               | hE53g14              | AATTCAGAATCAGTGGGATG  | AAG |
|                               | hE53g15              | TTGAAAGAATTCAGAATCAG  | TGG |
|                               | hE53g17              | ACCTTCAGAACCGGAGGCAA  | CAG |
|                               | hE53g18              | AATTCTTTCAAActagaataa | AAG |
|                               | hE53g19              | ttattctagTTGAAAGAATT  | CAG |
|                               | hE53g20              | tagTTGAAAGAATTCAGAAT  | CAG |
|                               | hE53g21              | ATGAAGTACAAGAACACCTT  | CAG |
|                               | hE53g22              | AACTGTTGCCTCCGGTTCTG  | AAG |
| hE53g23                       | CAAGAACACCTTCAGAACCG | GAG                   |     |
| Human sgRNA targeting exon 44 | hE44g4               | TAAATACAAATGGTATCTTA  | AGG |
|                               | hE44g7               | TTAGCATGTTCCCAATTCTC  | AGG |
|                               | hE44g8               | GGGAACATGCTAAATACAAA  | TGG |
|                               | hE44g10              | AGACACAAATTCCTGAGAAT  | TGG |
|                               | hE44g11              | GACACAAATTCCTGAGAATT  | GGG |
|                               | hE44g15              | ATTTAATCAGTGGCTAACAG  | AAG |
|                               | hE44g16              | AGAACTGTTCAGCTTCTGT   | TAG |
|                               | hE44g17              | AGTGGCTAACAGAAGCTGAA  | CAG |
|                               | hE44g18              | AAGCTGAACAGTTTCTCAGA  | AAG |
|                               | hE44g19              | TTTAGCATGTTCCCAATTCT  | CAG |
|                               | hE44g20              | CTTAAGATACCATTTGTATT  | TAG |
|                               | hE44g21              | CTAAATACAAATGGTATCTT  | AAG |
|                               | hE44g22              | TACAAATGGTATCTTAAggt  | aag |
|                               | hE44g23              | acaaatcaaagacttacCTT  | AAG |
| hE44g24                       | TGTCTTTCTGAGAACTGTT  | CAG                   |     |
| Control sgRNAs                | hCTRL1               | CACCAGAGTAACAGTCTGAG  | TAG |
|                               | hCTRL2               | ATCTTACAGGAACTCCAGGA  | TGG |
|                               | mCTRL1               | CACTAGAGTAACAGTCTGAC  | TGG |
|                               | mCTRL2               | GGCTTACAGGAACTCCAGGA  | TGG |
| Mouse sgRNA targeting exon 53 | mE53g1               | TGAAAGAATTCAGATTCAGT  | GGG |
|                               | mE53g2               | AATTCAGATTCAGTGGGATG  | AGG |

|                                                                                      |         |                      |     |
|--------------------------------------------------------------------------------------|---------|----------------------|-----|
|                                                                                      | mE53g3  | TTCAAGAACAGCTGCAGAAC | AGG |
|                                                                                      | mE53g8  | TTGAAAGAATTCAGATTCAG | TGG |
|                                                                                      | mE53g9  | AGTGGGATGAGGTTCAAGAA | CAG |
|                                                                                      | mE53g10 | AGCTGCAGAACAGGAGACAA | CAG |
|                                                                                      | mE53g11 | TGAATCTGAATTCTTTCAAC | TGG |
|                                                                                      | mE53g12 | CTTTCAACTGGAATAAAAAT | AAG |
|                                                                                      | mE53g13 | CTTATTTTTATTCCAGTTGA | AAG |
|                                                                                      | mE53g14 | TTATTCCAGTTGAAAGAATT | CAG |
|                                                                                      | mE53g15 | CAGTTGAAAGAATTCAGATT | CAG |
|                                                                                      | mE53g16 | GAATTCAGATTCAGTGGGAT | GAG |
|                                                                                      | mE53g17 | GATTCAGTGGGATGAGGTC  | AAG |
|                                                                                      | mE53g18 | ATGAGGTTCAAGAACAGCTG | CAG |
|                                                                                      | mE53g19 | GTTCAAGAACAGCTGCAGAA | CAG |
|                                                                                      | mE53g20 | AACTGTTGTCTCCTGTTCTG | CAG |
|                                                                                      | mE53g21 | CAAGAACAGCTGCAGAACAG | GAG |
| Mouse sgRNA targeting exon 44                                                        | mE44g3  | AGACACAAAATCCTGAAAAC | TGG |
|                                                                                      | mE44g4  | TTAGCATGTTCCAGTTTTC  | AGG |
|                                                                                      | mE44g5  | GACACAAAATCCTGAAAAC  | GGG |
|                                                                                      | mE44g6  | GGGAACATGCTAAATACAAA | TGG |
|                                                                                      | mE44g7  | TAAATACAAATGGTATCTTA | AGG |
|                                                                                      | mE44g10 | AAAACTGTTCAACTTCATT  | CAG |
|                                                                                      | mE44g11 | AATGGCTGAATGAAGTTGAA | CAG |
|                                                                                      | mE44g12 | AAGTTGAACAGTTTTTCAA  | AAG |
|                                                                                      | mE44g13 | TTTAGCATGTTCCAGTTTT  | CAG |
|                                                                                      | mE44g14 | CTTAAGATACCATTTGTATT | TAG |
|                                                                                      | mE44g15 | CTAAATACAAATGGTATCTT | AAG |
|                                                                                      | mE44g16 | TACAAATGGTATCTTAAGgt | AAG |
|                                                                                      | mE44g17 | AAATCTCAAAGTCTTACCTT | AAG |
| sgRNAs with NGG PAM are marked in green and sgRNAs with NAG PAM are marked in black. |         |                      |     |
