# Supplementary material
Source: PubMed Central journal article supplement (PMC7474267)
Supplement: mmc2.pdf [file mmc2.pdf]

# Correction of Three Prominent Mutations in Mouse and Human Models of Duchenne Muscular Dystrophy by Single-Cut Genome Editing

Yi-Li Min,<sup>1,3,4</sup> Francesco Chemello,<sup>1,3</sup> Hui Li,<sup>1,3</sup> Cristina Rodriguez-Caycedo,<sup>1</sup> Efrain Sanchez-Ortiz,<sup>1</sup> Alex A. Mireault,<sup>1</sup> John R. McAnally,<sup>1</sup> John M. Shelton,<sup>2</sup> Yu Zhang,<sup>1</sup> Rhonda Bassel-Duby,<sup>1</sup> and Eric N. Olson<sup>1</sup>

<sup>1</sup>Department of Molecular Biology, Hamon Center for Regenerative Science and Medicine, Senator Paul D. Wellstone Muscular Dystrophy Cooperative Research Center, University of Texas Southwestern Medical Center, 5323 Harry Hines Boulevard, Dallas, TX 75390, USA; <sup>2</sup>Department of Internal Medicine, University of Texas Southwestern Medical Center, Dallas, TX 75390, USA

**Duchenne muscular dystrophy (DMD), one of the most common neuromuscular disorders of children, is caused by the absence of dystrophin protein in striated muscle. Deletions of exons 43, 45, and 52 represent mutational “hotspot” regions in the dystrophin gene. We created three new DMD mouse models harboring deletions of exons 43, 45, and 52 to represent common DMD mutations. To optimize CRISPR-Cas9 genome editing using the single-cut strategy, we identified single guide RNAs (sgRNAs) capable of restoring dystrophin expression by inducing exon skipping and reframing. Intramuscular delivery of AAV9 encoding SpCas9 and selected sgRNAs efficiently restored dystrophin expression in these new mouse models, offering a platform for future studies of dystrophin gene correction therapies. To validate the therapeutic potential of this approach, we identified sgRNAs capable of restoring dystrophin expression by the single-cut strategy in cardiomyocytes derived from human induced pluripotent stem cells (iPSCs) with each of these hotspot deletion mutations. We found that the potential effectiveness of individual sgRNAs in correction of DMD mutations cannot be predicted *a priori*, highlighting the importance of sgRNA design and testing as a prelude for applying gene editing as a therapeutic strategy for DMD.**

## INTRODUCTION

Duchenne muscular dystrophy (DMD) is an X-linked genetic disorder caused by mutations in the *DMD* gene, a massive gene spanning ~2.3 Mb of DNA, encoding the dystrophin protein.<sup>1</sup> Dystrophin stabilizes muscle membranes by tethering the actin cytoskeleton to laminin on the inner surface of the sarcolemma.<sup>2,3</sup> The incidence of DMD is estimated at 1:5,000 boys worldwide. More than 7,000 mutations have been identified in DMD patients,<sup>4</sup> leading to the generation of a premature stop codon in the transcript and, consequently, to the absence of dystrophin protein. Many of these mutations lie within one of the hotspot regions spanning exons 43 to 53 of the dystrophin gene.<sup>4,5</sup> Lack of dystrophin in skeletal muscle results in fragility of the sarcolemma, myocyte necrosis, and eventual replacement of muscle

with fibrotic and fatty tissue.<sup>6</sup> The symptoms of DMD are initially manifested by muscle weakness and a loss of ambulation but ultimately culminate in cardiomyopathy, respiratory failure, and premature death. Thus far, there has been no effective cure for the disease, despite numerous therapeutic efforts.

Full restoration of normal levels of dystrophin is not essential for an effective therapy. It has been estimated that as little as ~15% of normal levels of dystrophin protein could confer substantial therapeutic benefits.<sup>7</sup> However, the minimal required level likely depends on the form of dystrophin being expressed. In a canine model of DMD, expression of micro-dystrophin (a truncated form of dystrophin) at ~50% of wild-type (WT) levels was shown to confer therapeutic benefit.<sup>8–10</sup>

Clustered regularly interspaced short palindromic repeat (CRISPR)-mediated gene editing represents a means of removing disease-causing mutations in the genome.<sup>11–13</sup> With this approach, single guide RNAs (sgRNAs) are used to direct Cas9 or other endonucleases to specific sequences in the genome. In the presence of an exogenous DNA template, Cas9 can promote homology-directed DNA repair (HDR), whereas in the absence of a template, DNA double-strand breaks (DSBs) are repaired by non-homologous end joining (NHEJ) with various insertions or deletions (INDELS).<sup>14</sup> Another pathway for repair of CRISPR-mediated DNA DSBs is microhomology-mediated end-joining (MMEJ), which uses regions with 5–25 bp of microhomology flanking a DSB for repair and results in deletion of the region between the microhomology.<sup>15</sup>

Received 13 March 2020; accepted 26 May 2020;  
<https://doi.org/10.1016/j.ymthe.2020.05.024>.

<sup>3</sup>These authors contributed equally to this work.

<sup>4</sup>Present address: Vertex Genetic Therapies, 490 Arsenal Way, Watertown, MA 02472, USA.

**Correspondence:** Eric N. Olson, Department of Molecular Biology, Hamon Center for Regenerative Science and Medicine, Senator Paul D. Wellstone Muscular Dystrophy Cooperative Research Center, University of Texas Southwestern Medical Center, 5323 Harry Hines Boulevard, Dallas, TX 75390, USA.

**E-mail:** [eric.olson@utsouthwestern.edu](mailto:eric.olson@utsouthwestern.edu)

Recent studies by our group and others have explored the potential of gene editing as a means of correcting DMD mutations *in vivo*.<sup>16–22</sup> Because HDR and MMEJ are restricted to proliferating cells, and mature myocytes are post-mitotic, CRISPR-Cas9 gene correction of DMD mutations requires the NHEJ pathway.<sup>23,24</sup> NHEJ gene editing by double-cut or single-cut has been deployed to correct the open reading frame (ORF) of dystrophin and restore protein expression from mutant *DMD* alleles. Each editing approach has unique advantages and challenges.

Double-cut editing offers the potential to excise large regions of the *DMD* gene, producing truncated but still functional dystrophin.<sup>20,22,25,26</sup> This approach allows correction of multiple types of mutations in a consolidated manner. However, it requires simultaneous DNA cutting with two sgRNAs separated by extended genomic distances and is relatively inefficient. Double-cutting can also introduce a relatively high frequency of unpredictable genomic rearrangements.<sup>21</sup>

To date, more than 60 spontaneous or engineered DMD animal models have been reported.<sup>27,28</sup> CRISPR-Cas9 has been used to restore dystrophin expression in mouse, dog, pig, and human cells harboring the most common mutations in DMD patients, such as deletion of exon 50 or exon 44.<sup>16,18,19</sup> Human exon 45 was deleted in the hDMD mouse model, which is a mouse containing the human dystrophin gene.<sup>29,30</sup> This mouse model allows testing of possible genetic interventions designed to treat human patients.

With single-cut CRISPR editing, a sgRNA can be used to introduce INDELs that eliminate splice acceptor or donor sites or out-of-frame exons, thereby allowing exon skipping and restoration of the correct ORF.<sup>16,18,19</sup> Alternatively, INDELs can be introduced within out-of-frame exons to restore the ORF by shifting the reading frame triplet forward ( $3n - 1$  nt) or backward ( $3n + 1$  nt). Single-cut editing has several advantages, including requiring only one sgRNA, relatively high efficiency, and minimal modification of the genome. However, it requires accurate optimization of sgRNAs for each mutational hotspot. For example, deletion of exon 50,<sup>16,18</sup> exon 44,<sup>19,31</sup> or exon 52 can be corrected by reframing the triplet codon reading frame of one of the flanking exons backward ( $3n + 1$  nt), but deletion of exon 43 or exon 45 necessitates reframing of the triplet reading frame forward ( $3n - 1$  nt) to achieve correction.

In addition to gene editing approaches based on the generation and repair of DSBs, CRISPR base editors have been developed that allow precise conversion of a single nucleotide base into another base.<sup>32</sup> These genome editing tools have been used to correct the point mutation in the mdx mouse model of DMD. However, the large size of base editors necessitates splitting into two halves *in vivo* delivery, decreasing editing efficiency and dystrophin restoration.<sup>33</sup>

By packaging sgRNA and Cas9 expression cassettes into adeno-associated viruses (AAVs), efficient gene editing and dystrophin restoration has been achieved in mice and other large animal models, such as

dogs and pigs.<sup>16–20,22,25,26,34</sup> One sgRNA or two sgRNAs have been used to permanently correct different mdx mouse models, as well as mice lacking exons 44 and 50. Interestingly, a recent study demonstrated the correction of an exon 52 deletion in a pig model of DMD by double-cutting sequences flanking exon 51 with CRISPR-Cas9.<sup>26</sup> In this study, we addressed the potential of single-cut gene editing in the exon-52-deleted mouse model.

For single-cut editing, a highly efficient sgRNA with the preferential generation of the correct INDEL patterns at the DSB site is required. However, it is not currently possible to predict *a priori* what sgRNAs might be most effective in allowing gene editing at different sites, necessitating experimental validation and identification of optimal sgRNAs for each type of mutational hotspot.

In this study, we generated three new DMD mouse models:  $\Delta 43$  (exon 43 deletion),  $\Delta 45$  (exon 45 deletion), and  $\Delta 52$  (exon 52 deletion) DMD mice, representing three common exon deletions in DMD patients. For each of these mouse models, we developed single-cut CRISPR editing strategies to restore dystrophin expression. We used a dual-AAV delivery system with single-stranded AAV (ssAAV) to express *SpCas9* and self-complementary AAV (scAAV) to express sgRNAs to deliver the CRISPR components and reframe the mutant *Dmd* gene to correct dystrophin expression in skeletal muscle. Additionally, to assess the therapeutic potential of the single-cut strategy, we generated cardiomyocytes from human DMD induced pluripotent stem cells (iPSCs) and tested the sgRNAs for effective CRISPR editing to restore dystrophin expression in these cells. This single-cut CRISPR gene editing strategy could potentially be effective as a therapy for ~18% of the DMD patient population. Our findings highlight the potential of gene editing to permanently correct a wide range of mutations that cause DMD and represent a significant step toward potential therapeutic translation.

## RESULTS

### Generation of Mice with Deletions of Dystrophin Exon 52, 43, or 45

To extend gene editing as a means of correcting common DMD mutations that have not been previously addressed *in vivo*, we generated mice with a deletion of exon 52 ( $\Delta 52$  DMD), exon 43 ( $\Delta 43$  DMD), or exon 45 ( $\Delta 45$  DMD) using CRISPR-Cas9 directed by two sgRNAs flanking each exon (Figure 1A; Table S1). C57BL/6 zygotes were co-injected with *in-vitro*-transcribed Cas9 mRNA and sgRNAs and then re-implanted into pseudo-pregnant females, yielding offspring that transmitted the mutant *Dmd* alleles through the germline. Deletion of *Dmd* exon 52, exon 43, or exon 45 was confirmed by RT-PCR analysis (Figure 1A). Deletion of each exon placed the dystrophin gene out of frame, leading to the absence of dystrophin protein in skeletal muscle and heart (Figure 1B). Mice lacking each exon showed pronounced dystrophic muscle at 1 month of age (Figure 1C). Serum analysis of the  $\Delta 52$ ,  $\Delta 43$ , and  $\Delta 45$  DMD mice showed elevated creatine kinase (CK) activity, a hallmark of muscle damage (Figure 1D). Overall, the severity and progression of disease in these mice, as marked by the absence of dystrophin protein expression, muscle

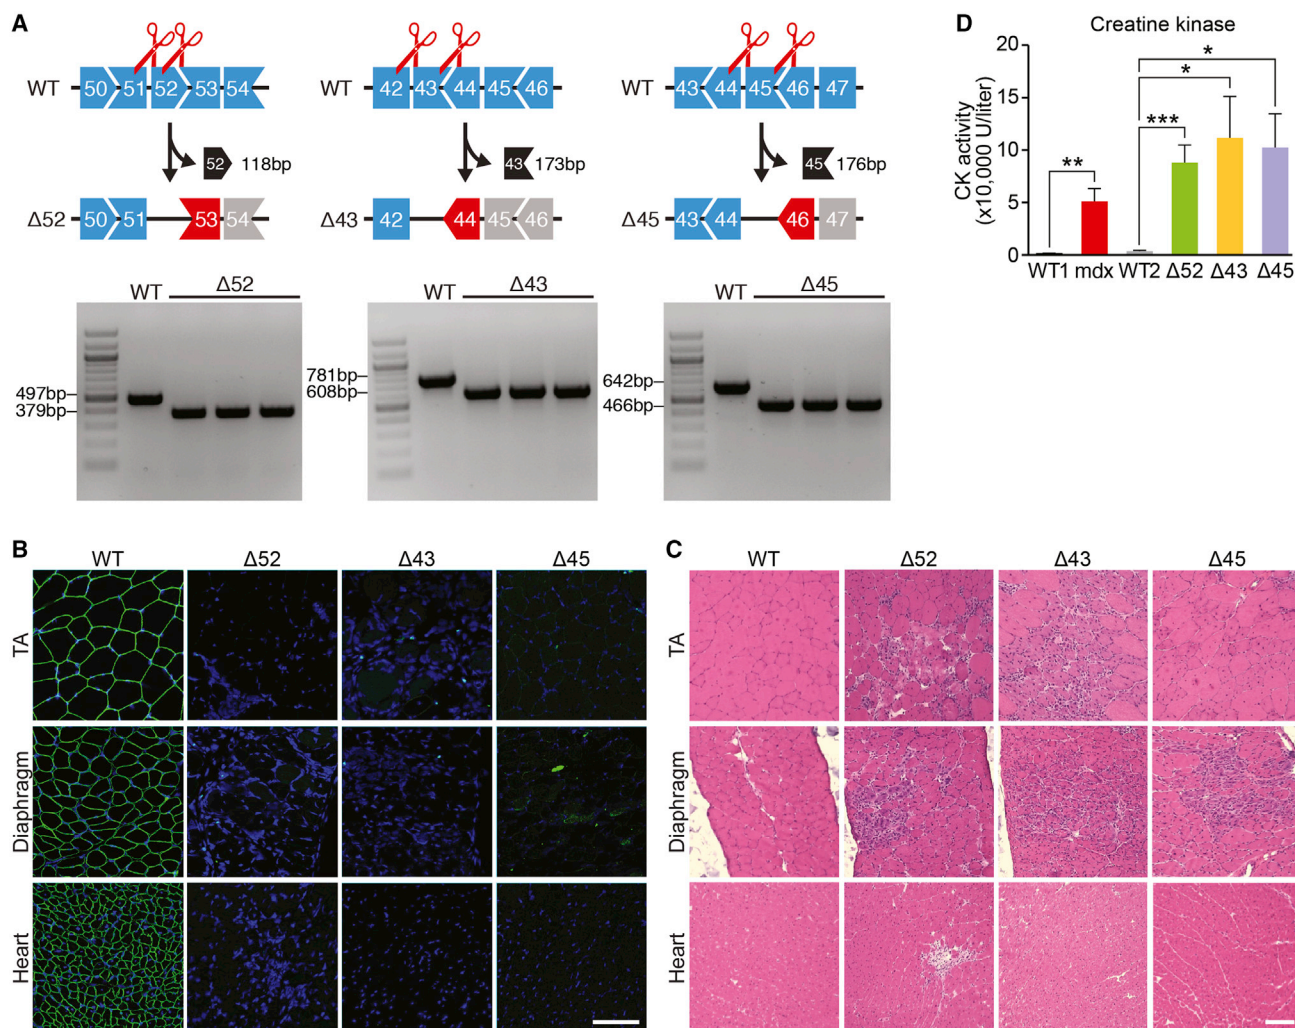

**Figure 1. Generation and Characterization of DMD Mouse Models with Deletion of Exon 52, 43, or 45**

(A) CRISPR-Cas9 editing using two sgRNAs flanking an exon was used to delete exon 52, 43, or 45 and generate DMD mouse model  $\Delta 52$ ,  $\Delta 43$ , or  $\Delta 45$ . Length of deleted exon is indicated (118 bp for  $\Delta 52$ , 173 bp for  $\Delta 43$ , and 176 bp for  $\Delta 45$ ). PCR products generated by primers flanking the deleted exons are indicated beneath each set of exons. Shapes of intron-exon junctions denote complementarity that maintains the ORF upon splicing. (B) Dystrophin staining of TA, diaphragm, and heart of WT and of  $\Delta 52$ ,  $\Delta 43$ , and  $\Delta 45$  DMD mice. Dystrophin is indicated in green. Nuclei are marked by DAPI stain in blue. Scale bar, 50  $\mu\text{m}$ . (C) H&E staining of TA, diaphragm, and heart of WT and of  $\Delta 52$ ,  $\Delta 43$ , and  $\Delta 45$  DMD mice. Note extensive inflammatory infiltrate and centralized myonuclei in  $\Delta 52$ ,  $\Delta 43$ , and  $\Delta 45$  DMD mice. Scale bar, 100  $\mu\text{m}$ . (D) Serum creatine kinase (CK), a marker of muscle damage and membrane leakage, was measured in WT1 (C57BL/6) and WT2 (C57BL/10), mdx,  $\Delta 52$ ,  $\Delta 43$ , and  $\Delta 45$  DMD mice. \* $p < 0.05$ ; \*\* $p < 0.005$ ; \*\*\* $p < 0.001$  ( $n = 5$ ). Data are presented as means  $\pm$  SEM.

histology, and serum CK (Figures 1B–1D), were comparable to those in other mouse models of DMD, such as mdx mice that were described previously.<sup>35,36</sup>

#### Correction of DMD Exon 52 Deletion in Mice by Intramuscular (IM) AAV9 Delivery of Gene Editing Components

In  $\Delta 52$  DMD mice, the absence of exon 52 causes exon 53 to be out of frame with preceding exons (Figures 2A and S1A). Skipping of exon 53 or introduction of  $3n + 1$  INDELs before the stop codon in exon 53 has the potential to restore the correct ORF of dystrophin. Destroying the splice acceptor site for exon 53 by targeting *SpCas9* using a specific

sgRNA to that sequence will cause exon 53 skipping, allowing splicing of exon 51 to exon 54 and restoration of dystrophin expression (Figure 2A). Following NHEJ, repair of the DSB at the splice acceptor site may also introduce  $3n + 1$  INDELs in exon 53, allowing reframing and restoration of dystrophin expression (Figure 2A).

For CRISPR single-cut editing of the splice acceptor site for exon 53, we designed 17 mouse sgRNAs (marked with “m”) in the proximity of the 5' end of mouse exon 53 (Figure S1B). The cutting sites of the sgRNAs with reframing potential were designed to be located upstream of the premature stop codon in exon 53 that results from

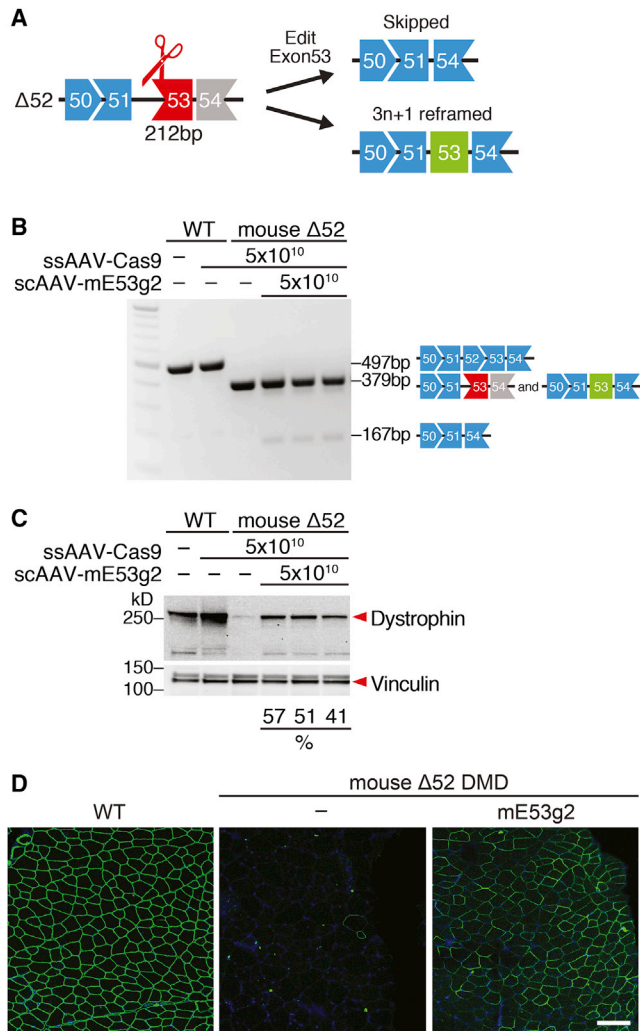

**Figure 2. Intramuscular AAV9 Delivery of Gene Editing Components to  $\Delta$ 52 DMD Mice Rescues Dystrophin Expression**

(A) Diagram for sgRNA targeting strategy of exon 53 (212 bp) and potential products after editing. (B) RT-PCR analysis of TA muscles from WT and  $\Delta$ 52 DMD mice 3 weeks after intramuscular injection of ssAAV-Cas9 and scAAV-mE53 g2. Restoration of the ORF is obtained by reframing (middle bands, 379 bp) or skipping of exon 53 (lower bands, 167 bp). The proportion of the different products is illustrated in Figure S2A. (C) Western blot analysis indicates restoration of dystrophin expression in TA muscle of  $\Delta$ 52 DMD mice after AAV-Cas9 and AAV-mE53 g2 treatment. Relative dystrophin intensity (%) was calibrated with vinculin internal control before normalizing to the untreated WT control. (D) Immunohistochemistry indicates restoration of dystrophin in TA muscle of  $\Delta$ 52 DMD mice 3 weeks after intramuscular injection of gene editing components sgRNA-mE53 g2 and SpCas9, carried by AAV9. Dystrophin is indicated in green. Nuclei are marked by DAPI stain in blue. Scale bar, 100  $\mu$ m.

the deletion of exon 52 (Figure S1B). Using mouse N2a cells to screen genomic editing of sgRNAs that target exon 53, we found that sgRNA mE53 g2 showed superior total INDEL efficiency by Tracking of INDELS by Decomposition (TIDE) analysis (Figure S1C). Based on these *in vitro* findings, we selected mouse sgRNA mE53 g2 for evalu-

ating *in vivo* exon skipping and/or exon reframing in the  $\Delta$ 52 DMD mouse model.

We used recombinant AAV9 to deliver the CRISPR components to the DMD mouse models, because AAV9 is a DNA virus that displays tropism to both skeletal muscle and heart and has been used in numerous clinical trials.<sup>37–40</sup> To test the genomic editing efficiency of the sgRNA *in vivo*, we used a dual-AAV9 viral system due to the cargo size limitation of AAV9 delivery system.<sup>18</sup> We packaged an SpCas9 expression cassette in a single-stranded AAV9 (ssAAV9) vector and packaged the mouse sgRNA mE53 g2 expression cassette in a different self-complementary AAV9 (scAAV9) vector. Based on our previous studies, we discovered that scAAV9 expresses higher levels of sgRNA and increases the efficiency of genomic editing.<sup>31</sup> To enhance muscle-specific gene editing and ensure SpCas9 expression primarily in skeletal and cardiac muscle, the CK8e regulatory cassette that combines enhancer and promoter regions of the muscle CK gene was utilized to drive SpCas9 expression in skeletal muscle.<sup>41,42</sup> For expression of sgRNA, we used three RNA polymerase III promoters (U6, H1, and 7SK) to express three copies of each sgRNA, as described previously.<sup>43</sup>

To validate the efficacy of the single-cut genomic editing strategy in the  $\Delta$ 52 DMD mouse model, we performed localized IM injection of ssAAV9 encoding SpCas9 (ssAAV-Cas9) and scAAV9 encoding sgRNA (scAAV-mE53 g2) in the tibialis anterior (TA) muscle of post-natal day 12 (P12) mice. As a control group, WT and  $\Delta$ 52 DMD mice were injected with ssAAV-Cas9 without scAAV-sgRNA. In this study, 50  $\mu$ L AAV9 was injected per leg, containing equal doses of ssAAV-Cas9 ( $5 \times 10^{10}$  vg per leg) and scAAV-sgRNAs ( $5 \times 10^{10}$  vg per leg). Three weeks after IM injection, we collected the TA muscles for analysis.

RT-PCR showed a distinct exon skipping band at 167 bp below the  $\Delta$ 52 DMD band at 379 bp (Figure 2B). TIDE analysis of the RT-PCR product also revealed that, in addition to exon skipping (10.3%), sgRNA mE53 g2 generated INDELS that allowed the reframing of the ORF (3n + 1, 4.3%; Figure S2A).

To evaluate dystrophin protein restoration after IM injection, we performed western blot analysis on the TA muscles of ssAAV-Cas9/scAAV-mE53 g2 treated  $\Delta$ 52 DMD mice. In ssAAV-Cas9/scAAV-mE53 g2-treated TA muscle, we observed ~50% of dystrophin protein restoration (Figure 2C). Immunostaining and whole-muscle scanning also revealed that ssAAV-Cas9/scAAV-mE53 g2-treated muscles restored ~72% of dystrophin-positive fibers (Figures 2D and S3A). Histological whole-muscle scanning and hematoxylin and eosin (H&E) staining showed that injection of ssAAV-Cas9/scAAV-mE53 g2 rescued the dystrophic phenotype, reducing necrotic cells and centralized nuclei (Figures S3B and S3C).

#### Correction of DMD Exon 52 Deletion in Human iPSCs by Delivery of Gene Editing Components

Correction of DMD exon 52 deletion by gene editing of exon 53 can potentially benefit 10% of DMD patients.<sup>5</sup> To test whether the gene

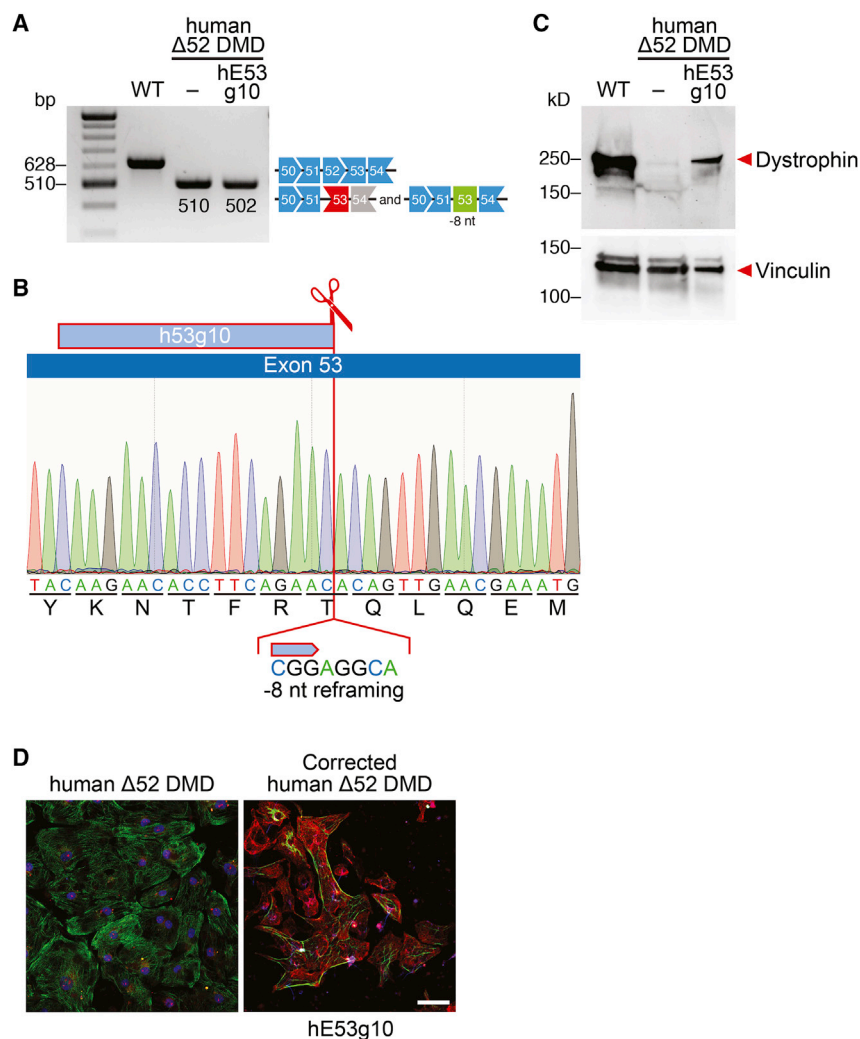

**Figure 3. Human  $\Delta 52$  DMD iPSC-Derived Cardiomyocytes Express Dystrophin after CRISPR-Cas9-Mediated Genome Editing**

(A) RT-PCR analysis of WT and  $\Delta 52$  DMD iPSC-derived cardiomyocytes after CRISPR-Cas9-mediated genome editing using hE53 g10 sgRNA. Restoration of the ORF is obtained by 8-nt deletion (band size, 502 bp). (B) Sequence of the restored ORF obtained by 8-nt deletion of exon 53 using sgRNA hE53 g10 and SpCas9 gene editing. (C) Western blot analysis indicates restoration of dystrophin protein expression in human  $\Delta 52$  DMD iPSC-derived cardiomyocytes with hE53 g10 sgRNA, as indicated. Vinculin is the loading control. (D) Immunostaining indicates restoration of dystrophin expression in edited  $\Delta 52$  DMD iPSC-derived cardiomyocytes using hE53 g10 sgRNA and SpCas9. Dystrophin is indicated in red. Cardiac troponin I is indicated in green. Nuclei are marked by DAPI stain in blue. Scale bar, 50  $\mu$ m.

hE53 g10, and the cells were differentiated into cardiomyocytes. Single-clone characterization by RT-PCR and sequencing showed an 8-nt deletion, consistent with the reframing strategy (Figures 3A and 3B). Western blot and immunocytochemistry of iPSC-derived cardiomyocytes edited with sgRNA hE53 g10 showed restoration of dystrophin expression (Figures 3C and 3D).

#### Correction of DMD Exon 43 and 45 Deletions in Mice by Intramuscular AAV9 Delivery of Gene Editing Components

In  $\Delta 43$  DMD mice, the lack of exon 43 generates a premature stop codon in the proximity of the 5' region of exon 44. In  $\Delta 45$  DMD mice, the absence of exon 45 causes exon 46

to be out of frame with preceding exons. Skipping of exon 44 can potentially restore dystrophin expression for both  $\Delta 43$  DMD mice and  $\Delta 45$  DMD mice. Moreover, 3n – 1 reframing of exon 44 can potentially restore the ORF and correct exon 45 deletion. However, the 3n – 1 reframing event in the 5' region of exon 44 results in the introduction of a new stop codon in the context of the  $\Delta 45$  DMD deletion (Figures 4A, S4A, and S4B). Due to these considerations, an editing strategy that aims to use the same sgRNA to correct both  $\Delta 43$  and  $\Delta 45$  DMD models needs to target the proximity of the splice donor site of exon 44 in the 3' region of the exon.

To target the splice donor site of exon 44, allowing for exon skipping of  $\Delta 43$  and  $\Delta 45$  deletions, or to introduce 3n – 1 INDELS in exon 44, allowing for reframing  $\Delta 45$  deletions, we designed 13 mouse sgRNAs at the 3' end of mouse exon 44 (Figure S4B). By screening these sgRNAs in mouse N2a cells, we found that sgRNA mE44 g7 showed superior total INDEL efficiency by TIDE analysis (Figure S4C). Due to its localization, sgRNA mE44 g7 has the

editing strategy that we validated in mice also works in human cells from DMD patients, we generated exon 52-deleted human iPSCs (human  $\Delta 52$  DMD) by reprogramming the peripheral blood mononuclear cells (PBMCs) from a DMD patient with an exon 52 deletion. Similar to the mouse  $\Delta 52$  DMD correction strategy, we designed 17 human sgRNAs (marked with “h”) in the proximity of the 5' end of mouse exon 53, upstream of the premature stop codon (Figure S1D). By screening the sgRNAs in human 293T cells, we found that sgRNA hE53 g10 showed superior editing activity, based on total INDEL efficiency as measured by TIDE analysis (Figure S1E). Based on these findings, human sgRNA hE53 g10 was tested for its ability to restore dystrophin expression in the human  $\Delta 52$  iPSC model.

We found that sgRNA hE53 g10 generated 26% of 3n + 1 genomic INDELS in human  $\Delta 52$  DMD iPSCs (Figure S2B). Thus, this human sgRNA can potentially restore the dystrophin ORF by reframing exon 53. Human  $\Delta 52$  DMD iPSCs were subjected to editing with sgRNA

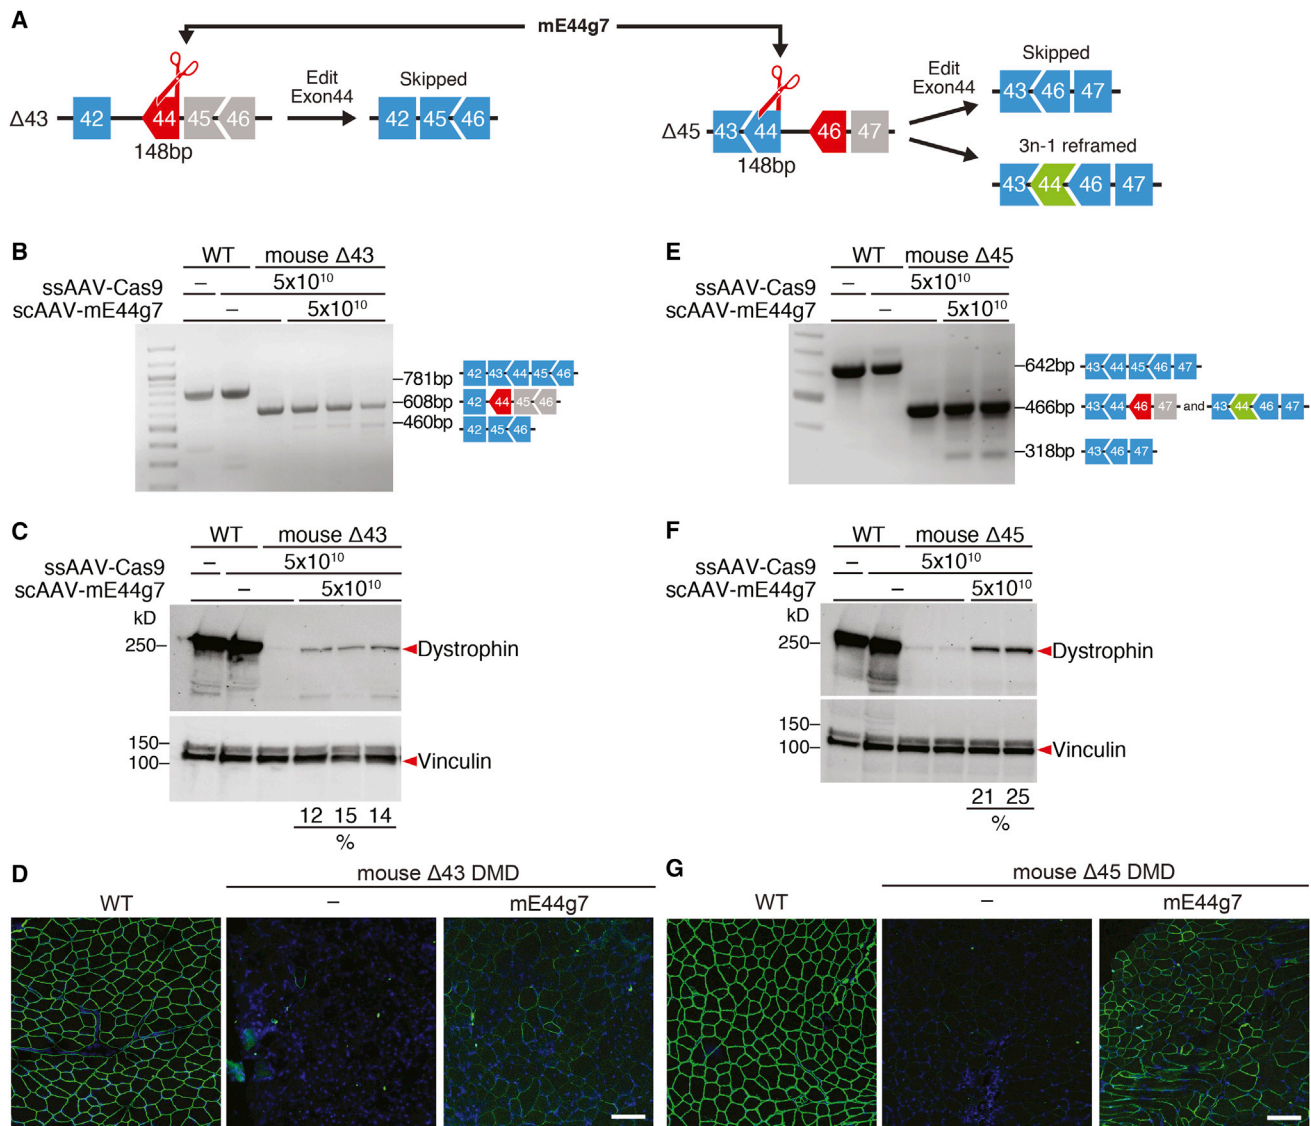

**Figure 4. Intramuscular AAV9 Delivery of Gene Editing Components to Δ43 and Δ45 DMD Mice Rescues dystrophin Expression**

(A) Diagram for exon 44 (148 bp) targeting strategy and potential products after editing of Δ43 and Δ45 DMD mice. The same sgRNA (mE44 g7) has been used to correct both mutations. (B and E) RT-PCR analysis of TA muscles from WT, Δ43, and Δ45 DMD mice 3 weeks after intramuscular injection of ssAAV-Cas9 and scAAV-mE44 g7. (B) For Δ43 DMD mice, restoration of the ORF is obtained by skipping of exon 44 (lower bands, 460 bp). The proportion of the different products is illustrated in Figure S5A. (E) For Δ45 DMD mice, restoration of the ORF is obtained by reframing (middle bands, 466 bp) or skipping of exon 44 (lower bands, 318 bp). The proportion of the different products is illustrated in Figure S5C. (C and F) Western blot analysis indicates restoration of dystrophin expression in TA muscle of (C) Δ43 and (F) Δ45 DMD mice after injection of AAV-Cas9 and AAV-mE44 g7. Relative dystrophin intensity (%) was calibrated with vinculin internal control before normalizing to the untreated WT control. (D and G) Immunohistochemistry indicates restoration of dystrophin in TA muscle of (D) Δ43 and (G) Δ45 DMD mice 3 weeks after intramuscular injection of gene editing components sgRNA-mE44 g7 and SpCas9, carried by AAV9. Dystrophin is shown in green. Nuclei are marked by DAPI stain in blue. Scale bars, 100 μm.

potential to induce both exon skipping and reframing. Therefore, mouse sgRNA mE44 g7 was selected for testing exon skipping and/or exon reframing capability in both the Δ43 and Δ45 DMD mouse models. The dual viral delivery strategy (ssAAV9-SpCas9 and scAAV-sgRNA) of the gene editing components was the same as described earlier for the correction of the Δ52 DMD mouse model.

In Δ43 DMD muscle edited with sgRNA mE44 g7 and SpCas9, RT-PCR analysis showed a distinct exon-skipping band at 460 bp below the Δ43 DMD band at 608 bp (Figure 4B). TIDE analysis of the RT-PCR product revealed that sgRNA mE44 g7 generated ~16% of the average total INDELS following IM injection and that 3.7% of the transcripts successfully skipped exon 44; none of the transcripts were the product of 3n - 1 reframing (Figure S5A). These results

demonstrated that our predicted strategy for editing with sgRNA mE44 g7 in  $\Delta 43$  DMD is robust. In fact, sgRNA mE44 g7 targets the 3' end of exon 44 and destroys the splice donor site of exon 44. Correction of the exon 43 deletion using sgRNA mE44 g7 with SpCas9 induces exon skipping, but not exon reframing, in exon 44.

In ssAAV-Cas9- and scAAV-mE44 g7-treated  $\Delta 43$  DMD muscle, the restoration of dystrophin was about 14% of WT levels (Figure 4C). Immunostaining and whole-muscle scanning also revealed that scAAV-mE44 g7-treated muscles restored ~36% of dystrophin-positive fibers (Figures 4D and S6A). H&E staining and whole-muscle scanning showed that scAAV-mE44 g7 slightly improved the dystrophic phenotype (Figures S6B and S6C). Using the same scAAV-mE44 g7 to treat  $\Delta 45$  DMD muscle, RT-PCR revealed a distinct exon-skipping band at 318 bp below the  $\Delta 45$  DMD band at 466 bp (Figure 4E). TIDE analysis of the RT-PCR product showed a similar total INDEL percentage of scAAV-mE44 g7-treated  $\Delta 43$  DMD muscles (~21%) (Figure S5C). Specifically, TIDE analysis of the RT-PCR product revealed that 3.4% of the transcripts successfully skipped exon 44 and that 6.3% of the transcripts were the product of  $3n - 1$  reframing (Figure S5C). These findings confirmed the accuracy of the strategy for correction of  $\Delta 45$  DMD mice with sgRNA mE44 g7. As a sgRNA that targets the 3' end of exon 44, mE44 g7 can correct exon 45 deletion by inducing both exon skipping and exon reframing in exon 44.

Dystrophin protein expression was restored to 23% of the WT level with scAAV-mE44 g7 (Figure 4F). Immunostaining and whole-muscle scanning also revealed that scAAV-mE44 g7-treated  $\Delta 45$  DMD TA muscles showed ~60% of dystrophin-positive fibers (Figures 4G and S7A). H&E staining and whole-muscle scanning showed that scAAV-mE44 g7 improved the dystrophic phenotype of the injected muscle (Figures S7B and S7C). Although scAAV-mE44 g7 with ssAAV-Cas9 restores dystrophin expression in both  $\Delta 43$  and  $\Delta 45$  DMD mouse models, the higher efficiency achieved in  $\Delta 45$  DMD muscles is likely due to the combination of exon skipping and reframing events.

#### Correction of DMD Exon 43 and 45 Deletions in Human iPSCs by Delivery of Gene Editing Components

As shown *in vivo*, DMD mice with a deletion of exon 43 or deletion of exon 45 can be corrected using the same sgRNA (mE44 g7) by editing the 3' region of exon 44. Gene editing and correction of exon 44 can potentially benefit 7.6% of DMD patients. To test whether the gene editing strategy that we validated in  $\Delta 43$  and  $\Delta 45$  DMD mice also works in human cells, we generated exon-45- and exon-43-deleted human iPSCs (human  $\Delta 43$  DMD and human  $\Delta 45$  DMD) by removing exon 43 or exon 45 in a normal (WT) human iPSC line. Similar to the mouse correction strategy, we designed 15 human sgRNAs at the 3' end of human exon 44 (Figure S4D) to target the splice donor site for exon 44 to allow exon skipping for human  $\Delta 43$  and human  $\Delta 45$  DMD iPSCs or to introduce  $3n-1$  INDELS in exon 44, allowing for reframing of human  $\Delta 45$  DMD iPSCs. By screening these sgRNAs in human 293T cells, we found that sgRNA hE44 g4 with SpCas9 showed superior total INDEL efficiency by TIDE analysis (Figure S4E). Due to its localization, hE44 g4 has the

potential to induce both exon skipping and reframing and shares the same sequence of the tested sgRNA mE44 g7. Therefore, human sgRNA hE44 g4 was tested for its ability to restore dystrophin expression in the human  $\Delta 43$  and  $\Delta 45$  DMD iPSC models.

We found that sgRNA hE44 g4 and SpCas9 generated 8% of genomic INDELS, resulting in the destruction of the exon 44 splice donor site in human  $\Delta 43$  DMD iPSCs (Figure S5B). Therefore, this human sgRNA can potentially restore the dystrophin ORF by skipping exon 44. Human  $\Delta 43$  DMD iPSCs were subjected to editing with sgRNA hE44 g4, and the cells were differentiated into cardiomyocytes. Single-clone characterization by RT-PCR and sequencing showed the deletion of exon 44, consistent with the exon-skipping strategy (Figures 5A and 5B). Western blot analysis and immunocytochemistry of iPSC-derived cardiomyocytes edited with sgRNA hE44 g4 confirmed restoration of dystrophin expression (Figures 5C and 5D).

Next, we tested sgRNA hE44 g4 in human  $\Delta 45$  DMD iPSCs for its ability to restore the dystrophin ORF by reframing exon 44. Addition of sgRNA hE44 g4 and SpCas9 to  $\Delta 45$  DMD iPSCs generated 10% of  $3n - 1$  genomic INDELS (Figure S5D). To assess restoration of dystrophin expression, human  $\Delta 45$  DMD iPSCs were subjected to editing with sgRNA hE44 g4 and SpCas9, followed by differentiation to cardiomyocytes. Single-clone characterization by RT-PCR and sequencing showed a 1-nt deletion, consistent with the reframing strategy (Figures 5E and 5F). Western blot analysis and immunocytochemistry of iPSC-derived cardiomyocytes edited with sgRNA hE44 g4 showed restoration of dystrophin expression (Figures 5G and 5H). Together, these data demonstrate that sgRNA hE44 g4 is a good candidate for future therapeutic applications to correct both exon 43 and exon 45 human DMD deletions.

#### DISCUSSION

Deletions of exon 43, 45, or 52 represent three prominent human DMD mutations, and targeting exon 44 or 53 with single-cut correction could potentially benefit ~18% of the DMD patient population. Despite the prevalence of these mutations, there are no DMD mouse models with deletions of these key exons, hindering that ability to test different therapeutic strategies to rescue dystrophin expression. In this study, we generated three new mouse models with the deletion of dystrophin exon 43, 45, or 52, which recapitulate the pathologic hallmarks of DMD. These mice represent an important resource not only for testing possible gene editing therapies, as shown here, but also for investigating other therapeutic modalities either alone or in combination with gene editing.

To optimize single-cut genome editing correction of these DMD mutations, we systematically tested different sgRNAs that target DMD exons 44 and 53, with the potential to restore dystrophin expression through exon skipping and/or reframing in these new DMD mouse models. We demonstrated dystrophin protein recovery following IM delivery of AAV9 encoding selected sgRNAs and SpCas9. To ascertain the therapeutic potential of our strategies for correction of these three exon deletions, we generated human iPSC lines bearing

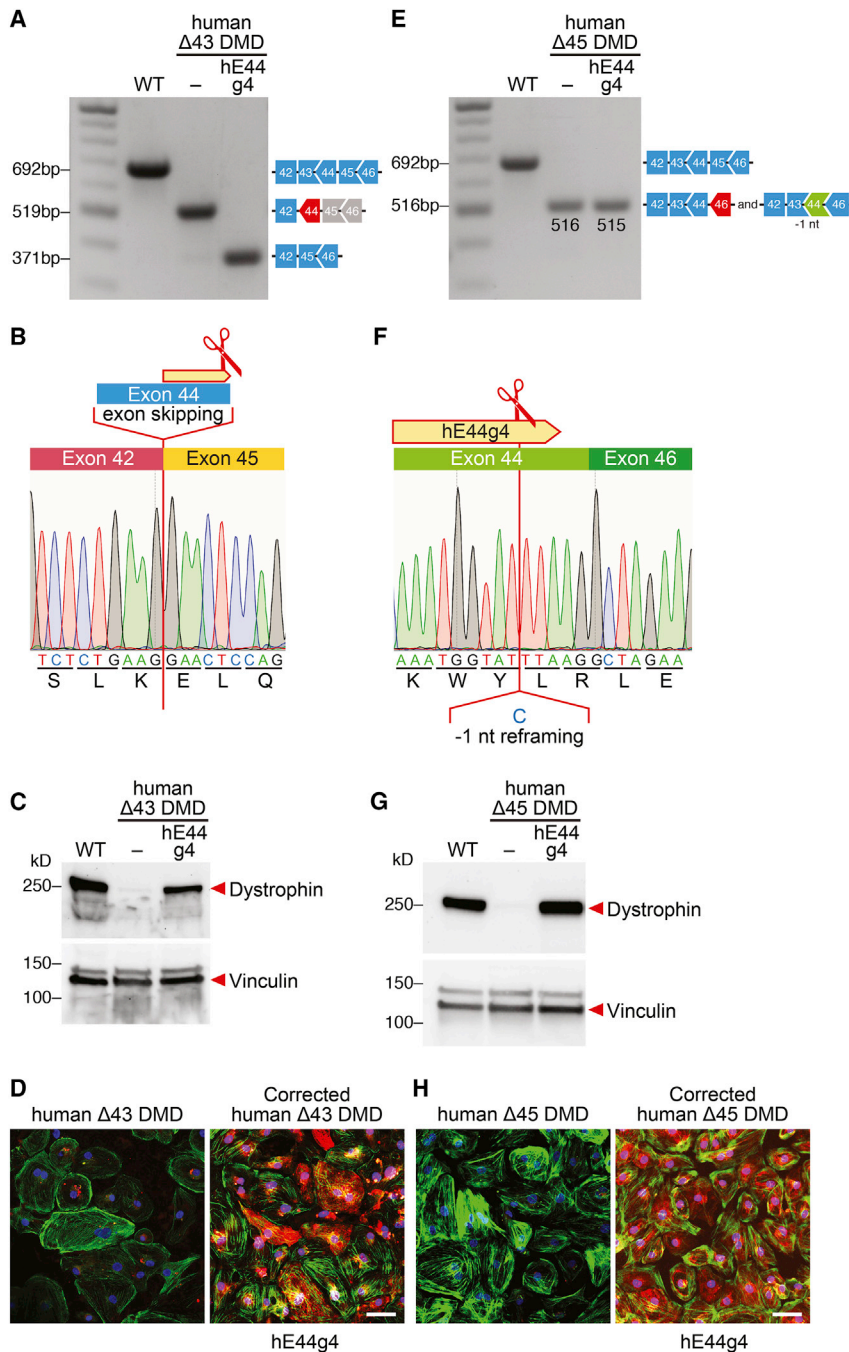

**Figure 5. Human  $\Delta 43$  and  $\Delta 45$  DMD iPSC-Derived Cardiomyocytes Express Dystrophin after CRISPR-Cas9-Mediated Genome Editing**

(A and E) RT-PCR analysis of WT,  $\Delta 43$ , and  $\Delta 45$  DMD iPSC-derived cardiomyocytes after CRISPR-Cas9-mediated genome editing using hE44 g4 sgRNA and SpCas9. (A) For  $\Delta 43$  DMD iPSC-derived cardiomyocytes, restoration of the ORF is obtained by exon skipping of exon 44 (148 bp; band size, 371 bp). (E) For human  $\Delta 45$  DMD iPSC-derived cardiomyocytes, restoration of the ORF is obtained by 1-nt deletion within exon 44 (band size, 515 bp). (B and F) Sequences of the restored ORF obtained by (B) skipping of exon 44 (for  $\Delta 43$ ) or by (F) 1-nt deletion editing exon 44 (for  $\Delta 45$ ) with hE44 g4 sgRNA. (C and G) Western blot analysis indicates restoration of dystrophin protein expression in (C)  $\Delta 43$  and (G)  $\Delta 45$  DMD iPSC-derived cardiomyocytes with hE44 g4 sgRNA, as indicated. Vinculin is the loading control. WT, iPSC-derived cardiomyocytes from a healthy control. (D and H) Immunostaining indicates restoration of dystrophin expression in edited (D)  $\Delta 43$  and (H)  $\Delta 45$  DMD iPSC-derived cardiomyocytes. Dystrophin is indicated in red. Cardiac troponin I is indicated in green. Nuclei are marked by DAPI stain in blue. Scale bars, 50  $\mu$ m.

with CRISPR-Cas9 genome editing using sgRNA mE53 g2 for correcting the  $\Delta 52$  mouse model and sgRNA mE44 g7 for correcting the  $\Delta 45$  mouse model. Interestingly, we found that sgRNA mE44 g7 can correct both  $\Delta 43$  and  $\Delta 45$  DMD mutations. Genome editing using sgRNA mE44 g7 generated a similar frequency of IN-DELS in  $\Delta 43$  and  $\Delta 45$  DMD muscles. However, the dystrophin transcripts generated from these different corrected genes reflected the differences of the strategy. In particular, sgRNA mE44 g7 generated both exon-reframed and exon-skipped transcripts in  $\Delta 45$  DMD muscle, but in  $\Delta 43$  DMD muscle, sgRNA mE44 g7 generated only exon-skipped transcripts. The dystrophin protein recovery reflects the differences of the strategy, so that restoration of dystrophin in  $\Delta 45$  DMD muscle was more efficient than in  $\Delta 43$  DMD muscle when using the same sgRNA mE44 g7 for genomic editing.

As observed with  $\Delta 45$  DMD mutations, different genomic editing strategies can be deployed, resulting in skipping or reframing different exons to correct a single type of DMD mutation. When selecting the genomic strategy to correct a specific mutation, consideration should be given to the possible functional outcomes obtained by the various truncated forms of dystrophin produced (e.g., editing exon 44 versus 46). For example, it has been reported that deletion of exons 45 and 46 is associated with a severe DMD phenotype, although deleting these two exons produces an in-frame dystrophin.<sup>44</sup> Interestingly, when searching multiple DMD

similar exon deletion mutations. We then identified the most efficient sgRNAs capable of restoring dystrophin in human iPSC-derived cardiomyocytes from our DMD models.

Our *in vivo* results demonstrate that single-cut gene editing using a sgRNA that permits both exon skipping and exon reframing (instead of only exon skipping) confers the highest efficiency of dystrophin restoration. The highest efficacy of dystrophin recovery was obtained



databases, very few patients lacking exons 44 and 45 were found, suggesting a bias of such mutations toward a very mild BMD phenotype.<sup>4,44</sup> Such considerations may have significant consequences for eventual therapeutic outcomes.

Overall, our results highlight several key considerations in defining the choice of genomic editing strategy by selecting optimal sgRNAs for DMD gene correction. (1) 3n + 1 and 3n-1 reframing can be equally efficient when the top selected sgRNA can create desired INDEL types. (2) The INDEL types that a particular sgRNA creates in cultured cells is extremely important for predicting dystrophin protein restoration *in vivo*. (3) Dystrophin restoration by exon reframing is more efficient than exon skipping. sgRNAs that only induce exon skipping are less efficient and require further testing in mice to ensure dystrophin restoration efficiency.

Several previous studies indicated that no significant off-target effects were detected following single-cut gene editing in mice lacking exons 44 and 50 or following double-cut gene editing in mdx mice and a pig model of DMD lacking exon 52.<sup>18,19,21,26,31</sup> Although these studies failed to detect off-target cutting by deep sequencing, further assessment of potential off-target effects with other optimized sgRNAs should be performed when new tools for off-target analysis become available.

Finally, numerous gene editing strategies are being developed for a variety of clinical applications. The continuous development of high-fidelity gene editing tools to reduce potential off-target activity may facilitate progress toward the possible clinical utilization of the AAV9-Cas9 genome editing approach. Going forward, it will also be important to test multiple different sgRNAs for each genomic target so as to ensure optimal editing efficiency.

## MATERIALS AND METHODS

### Study Design

This study was designed with the primary aim of identifying the most efficient strategy to correct exon 52, exon 43, and exon 45 mutations in corresponding DMD mouse models and human DMD iPSCs. Secondary objectives were to investigate and compare the amounts of exon skipping/reframing, expression of dystrophin protein, and histological phenotype in corrected DMD mice. Animal work described in this article has been approved and conducted under the oversight of the University of Texas (UT) Southwestern Institutional Animal Care and Use Committee. Animals were allocated to experimental groups based on genotype; we did not use exclusion, randomization, or blinding approaches to assign the animals for the experiments. AAV injection and dissection experiments were conducted in a non-blinded fashion. Blinding approaches were used during histology validation and immunostaining analysis. PBMCs from healthy individuals and DMD patients were generated at the UT Southwestern Wellstone Myoediting Core. Male donors' PBMCs were used in all experiments. PBMCs were collected based on the mutation of the patients; we did not use exclusion, randomization, or blinding ap-

proaches to select the donors. For each experiment, sample size reflects the number of independent biological replicates.

### Plasmids

The pSpCas9(BB)-2A-GFP (PX458) plasmid contained the human codon-optimized SpCas9 gene with 2A-EGFP. pSpCas9(BB)-2A-GFP (PX458) was a gift from Feng Zhang (Addgene plasmid #48138).<sup>14</sup> Cloning of sgRNA was done using Bbs I sites. The sgRNAs in this study, listed in Table S2, were selected using prediction of <https://zlab.bio/guide-design-resources>. sgRNA sequences were cloned into PX458 and then tested in tissue culture using HEK293 and N2a cells, as previously described.<sup>45</sup>

The AAV TRISPR-sgRNAs-CK8e-GFP plasmid contained three sgRNAs driven by the U6, H1, or 7SK promoter. The expression cassette was synthesized (GenScript), digested with restriction enzymes, and subcloned into the pSJG self-complementary AAV plasmid, a gift from S. Gray (UT Southwestern).

### Mice

Mice were housed in a barrier facility with a 12-h:12-h light:dark cycle and maintained on standard chow (2916 Teklad Global).  $\Delta 52$ ,  $\Delta 43$ , and  $\Delta 45$  DMD mice were generated in the C57/BL6N background using the CRISPR-Cas9 system. The sgRNAs for generating the mouse models are listed in Table S1.

### Genomic DNA Isolation, PCR Amplification, and TIDE Analysis of PCR Products

Genomic DNA of mouse N2a cells and of human HEK293T cells and human iPSCs was isolated using DirectPCR (cell) lysis reagent (Viagen) according to the manufacturer's protocol. Genomic DNA of mouse muscle tissues was isolated using the DNeasy Blood and Tissue Kit (QIAGEN) according to the manufacturer's protocol. Genomic DNA was PCR amplified using GoTaq DNA polymerase (Promega) or with primers. RT-PCR products were sequenced and analyzed by TIDE analysis.<sup>46</sup> Primer sequences are listed in Table S1.

### AAV Vector Production

AAVs were prepared by the Boston Children's Hospital Viral Core, as previously described.<sup>47</sup> AAV vectors were purified by discontinuous iodixanol gradients (Cosmo Bio, AXS-1114542-5) and then concentrated with a Millipore Amicon filter unit (UFC910008, 100 kDa). AAV titers were determined by quantitative real-time PCR assays. Briefly, 4  $\mu$ L of the AAV vector was treated with DNase I (New England Biolabs, M0303S) and 2 M NaOH, followed by neutralization. The mixture was serially diluted, and Droplet Digital PCR (ddPCR) (Bio-Rad Laboratories) was performed according to the manufacturer's protocol.

### AAV9 Delivery to $\Delta 52$ , $\Delta 43$ , and $\Delta 45$ DMD Mice

Before intramuscular injection, the  $\Delta 52$ ,  $\Delta 43$ , and  $\Delta 45$  DMD mice were anesthetized. For AAV9 IM injection, the TA muscle of P12 male  $\Delta 52$ ,  $\Delta 43$ , and  $\Delta 45$  DMD mice was injected using an ultrafine needle (31G) with 50- $\mu$ L AAV9 preparations or with saline solution.

### Dystrophin Western Blot Analysis

For western blot of skeletal muscles, tissues were crushed into fine powder using a liquid-nitrogen-frozen crushing apparatus. For western blot of iPSC-derived cardiomyocytes,  $2 \times 10^6$  cardiomyocytes were harvested and lysed with lysis buffer (10% SDS, 62.5 mM Tris [pH 6.8], 1 mM EDTA, and protease inhibitor). Cell or tissue lysates were passed through a 25G syringe and then a 27G syringe, 10 times each. Protein concentration was determined by bicinchonic acid assay (BCA) assay, and 50  $\mu$ g total protein was loaded onto a 4%–20% acrylamide gel. Gels were run at 100 V for 15 min and switched to 200 V for 45 min followed by 1 h, 20 min transfer to a polyvinylidene fluoride (PVDF) membrane at 100 V at 4°C. The blot was incubated with mouse anti-dystrophin antibody (MANDYS8, Sigma-Aldrich, D8168) at 4°C overnight and then with goat anti-mouse horseradish peroxidase (HRP) antibody (Bio-Rad Laboratories) at room temperature for 1 h. The blot was developed using Western Blotting Luminol Reagent (Santa Cruz Biotechnology, sc-2048). The loading control was determined by blotting with mouse anti-vinculin antibody (Sigma-Aldrich, V9131).

### Histological Analysis of Muscles

Skeletal muscles from WT and from  $\Delta 52$ ,  $\Delta 43$ , and  $\Delta 45$  DMD mice were individually dissected and cryo-embedded in a 1:2 volume mixture of gum tragacanth powder (Sigma-Aldrich) to tissue-freezing medium (TFM) (Triangle Bioscience Science). All embeds were snap frozen in isopentane heat extractant supercooled to  $-155^\circ\text{C}$ . Resulting blocks were stored at  $-80^\circ\text{C}$  prior to sectioning. Eight-micron transverse sections of skeletal muscle and frontal sections of heart were prepared on a Leica CM3050 cryostat and air dried prior to staining on the same day. H&E staining was performed according to established staining protocols,<sup>17</sup> and dystrophin immunohistochemistry was performed using MANDYS8 monoclonal antibody (Sigma-Aldrich), with modifications to the manufacturer's instructions. In brief, cryostat sections were thawed and rehydrated/delipidated in 1% Triton/phosphate-buffered-saline (PBS; pH 7.4). Following delipidation, sections were washed free of Triton, incubated with mouse immunoglobulin G (IgG) blocking reagent (M.O.M. Kit, Vector Laboratories), washed, and sequentially equilibrated with M.O.M. protein concentrate/PBS and MANDYS8 diluted 1:1,800 in M.O.M. protein concentrate/PBS. Following overnight primary antibody incubation at 4°C, sections were washed, incubated with M.O.M. biotinylated anti-mouse IgG, and washed, and detection was completed with incubation of Fluorescein Avidin DCS (Vector Labs). Nuclei were counterstained with propidium iodide (Molecular Probes) prior to coverslipping with Vectashield.

### Human iPSC Maintenance and Nucleofection

Human iPSCs were cultured in mTeSR1 media (catalog no. 05850, StemCell Technologies) and passaged approximately every 3–4 days (1:6–1:18 split ratio). One hour before nucleofection, iPSCs were treated with 10  $\mu$ M ROCK inhibitor, Y-27632 (catalog no. S1049, Selleckchem), and dissociated into single cells using Accutase (catalog no. A6964, Innovative Cell Technologies). iPSCs ( $8 \times 10^5$ ) were mixed with 5  $\mu$ g total of pSpCas9(BB)-2A-GFP (PX458) from Feng Zhang

(MIT, Cambridge, MA, USA; Addgene plasmid 48138),<sup>14</sup> which contains gRNA as indicated, and then nucleofected using the P3 Primary Cell 4D-Nucleofector X Kit (catalog no. V4XP-3024, Lonza) according to the manufacturer's protocol. After nucleofection, iPSCs were cultured in mTeSR1 media supplemented with 10  $\mu$ M ROCK inhibitor and 100  $\mu$ g/mL Primocin (InvivoGen), and the next day, the media were switched to fresh mTeSR1. Two days after nucleofection, GFP(+) and GFP(–) cells were sorted by fluorescence-activated cell sorting (FACS) and subjected to genotyping by PCR. Single clones derived from GFP(+) iPSCs were picked, expanded, genotyped, and sequenced.

### Human iPSC-Cardiomyocyte Differentiation

To differentiate the iPSCs into cardiomyocytes, cells were cultured in CDM3 media<sup>48</sup> supplemented with 4–6  $\mu$ M CHIR99021 (catalog no. S2924, Selleckchem) for 2 days (days 1–2), followed by CDM3 supplemented with 2  $\mu$ M WNT-C59 (catalog no. S7037, Selleckchem) for 2 days (days 3–4). Starting from day 5, cells were cultured in basal media (RPMI-1640, catalog no. 11875-093, GIBCO, supplemented with B-27 Supplement, catalog no. 17504044, Thermo Fisher Scientific) for 6 days (days 5–10). On day 10 after differentiation initiation, media were changed to selective media (RPMI-1640, no glucose, catalog no. 11879-020, GIBCO, supplemented with B-27 Supplement) for 10 days (days 11–20) and, last, by basal media for 2 to 6 days. Then, the cardiomyocytes were dissociated using TrypLE Express media (catalog no. 12605-028, GIBCO) and replated at  $2 \times 10^6$  cells per well in a six-well dish. Cardiomyocytes were used for experiments on days 30–40 after initiation of differentiation.

### Statistics

All data are presented as means  $\pm$  SEM. Unpaired two-tailed Student's *t* tests were performed for comparison between the respective two groups (WT and DMD mice) in serum CK activities of the mouse models. Data analyses were performed with statistical software (GraphPad Prism Software, San Diego, CA, USA). The *p* values that were less than 0.05 were considered statistically significant.

### Data Availability

All data needed to evaluate the conclusions in the paper are present in the paper and/or the [Supplemental Information](#). Additional data related to this paper may be requested from the authors.

### SUPPLEMENTAL INFORMATION

Supplemental Information can be found online at <https://doi.org/10.1016/j.ymthe.2020.05.024>.

### AUTHOR CONTRIBUTIONS

Y.-L.M., F.C., H.L., R.B.-D., and E.N.O. wrote and edited the manuscript. Y.-L.M. generated the  $\Delta\text{Ex}52$ ,  $-43$ , and  $-45$  dystrophic mouse models and designed the gene editing strategy; performed AAV injection and animal studies; designed experiments; and performed sgRNA screening, western blots, imaging, and data analysis. H.L. cloned sgRNAs and performed sgRNA screening, RT-PCR, and TIDE analysis. F.C. performed animal studies, sgRNA screening,

and data analysis. C.R.-C. and F.C. performed iPSC culture and nucleofection experiments. E.S.-O. performed western blot, immunohistochemistry, and imaging. A.A.M. performed tissue-processing experiments. J.M.S. performed immunohistochemistry and H&E staining. J.R.M. performed the zygote injection to generate the mice. Y.Z. provided the modified scAAV backbone.

## CONFLICTS OF INTEREST

R.B.-D. and E.N.O. are consultants for Exonics Therapeutics/Vertex Genetic Therapies. Y.-L.M. is currently an employee of Vertex Genetic Therapies. The other authors declare no competing interests.

## ACKNOWLEDGMENTS

We thank J. Cabrera for graphics; C. Wang and the Boston Children's Hospital Viral Core for AAV production; the Metabolic Phenotyping Core for serum CK analysis; the Sanger Sequencing Core and Next Generation Sequencing Core for sequencing services; the Flow Cytometry Core for cell sorting; B. Johnson, K. Moulton, and A. Espejo for ddPCR-based AAV titer analysis; and J. Gromada, N. Jones, A. Mcvie-Wylie, and L. Amoasii for constructive advice. We are grateful to S. Hauschka (University of Washington) for providing the muscle-specific CK8e promoter, D. Grimm (University Hospital Heidelberg, Heidelberg, Germany) for providing TRISPR-sgRNA expression plasmid, and S. Gray (UT Southwestern Medical Center) for providing the self-complementary AAV plasmid. Funding: This work was supported by funds from NIH (HL130253 and AR-067294), the Senator Paul D. Wellstone Muscular Dystrophy Cooperative Research Center (U54 HD 087351), Vertex Genetic Therapies, and the Robert A. Welch Foundation (grant I-0025 to E.N.O.).

## REFERENCES

- Hoffman, E.P., Brown, R.H., Jr., and Kunkel, L.M. (1987). Dystrophin: the protein product of the Duchenne muscular dystrophy locus. *Cell* 51, 919–928.
- Ahn, A.H., and Kunkel, L.M. (1993). The structural and functional diversity of dystrophin. *Nat. Genet.* 3, 283–291.
- Campbell, K.P., and Kahl, S.D. (1989). Association of dystrophin and an integral membrane glycoprotein. *Nature* 338, 259–262.
- Bladen, C.L., Salgado, D., Monges, S., Foncuberta, M.E., Kekou, K., Kosma, K., Dawkins, H., Lamont, L., Roy, A.J., Chamova, T., et al. (2015). The TREAT-NMD DMD Global Database: analysis of more than 7,000 Duchenne muscular dystrophy mutations. *Hum. Mutat.* 36, 395–402.
- Aartsma-Rus, A., Van Deutekom, J.C.T., Fokkema, I.F., Van Ommen, G.J.B., and Den Dunnen, J.T. (2006). Entries in the Leiden Duchenne muscular dystrophy mutation database: an overview of mutation types and paradoxical cases that confirm the reading-frame rule. *Muscle Nerve* 34, 135–144.
- Allen, D.G., Whitehead, N.P., and Froehner, S.C. (2016). Absence of Dystrophin Disrupts Skeletal Muscle Signaling: Roles of Ca<sup>2+</sup>, Reactive Oxygen Species, and Nitric Oxide in the Development of Muscular Dystrophy. *Physiol. Rev.* 96, 253–305.
- Hoffman, E.P., Kunkel, L.M., Angelini, C., Clarke, A., Johnson, M., and Harris, J.B. (1989). Improved diagnosis of Becker muscular dystrophy by dystrophin testing. *Neurology* 39, 1011–1017.
- Ohshima, S., Shin, J.-H., Yuasa, K., Nishiyama, A., Kira, J., Okada, T., and Takeda, S. (2009). Transduction efficiency and immune response associated with the administration of AAV8 vector into dog skeletal muscle. *Mol. Ther.* 17, 73–80.
- Duan, D. (2015). Duchenne muscular dystrophy gene therapy in the canine model. *Hum. Gene Ther. Clin. Dev.* 26, 57–69.
- Le Guiner, C., Servais, L., Montus, M., Larcher, T., Fraysse, B., Moullec, S., Allais, M., François, V., Dutilleul, M., Malerba, A., et al. (2017). Long-term microdystrophin gene therapy is effective in a canine model of Duchenne muscular dystrophy. *Nat. Commun.* 8, 16105.
- Jinek, M., Chylinski, K., Fonfara, I., Hauer, M., Doudna, J.A., and Charpentier, E. (2012). A programmable dual-RNA-guided DNA endonuclease in adaptive bacterial immunity. *Science* 337, 816–821.
- Cong, L., Ran, F.A., Cox, D., Lin, S., Barretto, R., Habib, N., Hsu, P.D., Wu, X., Jiang, W., Marraffini, L.A., and Zhang, F. (2013). Multiplex genome engineering using CRISPR/Cas systems. *Science* 339, 819–823.
- Mali, P., Yang, L., Esvelt, K.M., Aach, J., Guell, M., DiCarlo, J.E., Norville, J.E., and Church, G.M. (2013). RNA-guided human genome engineering via Cas9. *Science* 339, 823–826.
- Ran, F.A., Hsu, P.D., Wright, J., Agarwala, V., Scott, D.A., and Zhang, F. (2013). Genome engineering using the CRISPR-Cas9 system. *Nat. Protoc.* 8, 2281–2308.
- Sakuma, T., Nakade, S., Sakane, Y., Suzuki, K.T., and Yamamoto, T. (2016). MMEJ-assisted gene knock-in using TALENs and CRISPR-Cas9 with the PITCh systems. *Nat. Protoc.* 11, 118–133.
- Amoasii, L., Hildyard, J.C.W., Li, H., Sanchez-Ortiz, E., Mireault, A., Caballero, D., Harron, R., Stathopoulou, T.R., Massey, C., Shelton, J.M., et al. (2018). Gene editing restores dystrophin expression in a canine model of Duchenne muscular dystrophy. *Science* 362, 86–91.
- Long, C., Amoasii, L., Mireault, A.A., McAnally, J.R., Li, H., Sanchez-Ortiz, E., Bhattacharyya, S., Shelton, J.M., Bassel-Duby, R., and Olson, E.N. (2016). Postnatal genome editing partially restores dystrophin expression in a mouse model of muscular dystrophy. *Science* 351, 400–403.
- Amoasii, L., Long, C., Li, H., Mireault, A.A., Shelton, J.M., Sanchez-Ortiz, E., McAnally, J.R., Bhattacharyya, S., Schmidt, F., Grimm, D., et al. (2017). Single-cut genome editing restores dystrophin expression in a new mouse model of muscular dystrophy. *Sci. Transl. Med.* 9, eaan8081.
- Min, Y.L., Li, H., Rodriguez-Caycedo, C., Mireault, A.A., Huang, J., Shelton, J.M., McAnally, J.R., Amoasii, L., Mammen, P.P.A., Bassel-Duby, R., and Olson, E.N. (2019). CRISPR-Cas9 corrects Duchenne muscular dystrophy exon 44 deletion mutations in mice and human cells. *Sci. Adv.* 5, eaav4324.
- Nelson, C.E., Hakim, C.H., Ousterout, D.G., Thakore, P.I., Moreb, E.A., Castellanos Rivera, R.M., Madhavan, S., Pan, X., Ran, F.A., Yan, W.X., et al. (2016). In vivo genome editing improves muscle function in a mouse model of Duchenne muscular dystrophy. *Science* 351, 403–407.
- Nelson, C.E., Wu, Y., Gemberling, M.P., Oliver, M.L., Waller, M.A., Bohning, J.D., Robinson-Hamm, J.N., Bulaklak, K., Castellanos Rivera, R.M., Collier, J.H., et al. (2019). Long-term evaluation of AAV-CRISPR genome editing for Duchenne muscular dystrophy. *Nat. Med.* 25, 427–432.
- Bengtsson, N.E., Hall, J.K., Odom, G.L., Phelps, M.P., Andrus, C.R., Hawkins, R.D., Hauschka, S.D., Chamberlain, J.R., and Chamberlain, J.S. (2017). Muscle-specific CRISPR/Cas9 dystrophin gene editing ameliorates pathophysiology in a mouse model for Duchenne muscular dystrophy. *Nat. Commun.* 8, 14454.
- Gallagher, D.N., and Haber, J.E. (2018). Repair of a Site-Specific DNA Cleavage: Old-School Lessons for Cas9-Mediated Gene Editing. *ACS Chem. Biol.* 13, 397–405.
- Hsu, P.D., Lander, E.S., and Zhang, F. (2014). Development and applications of CRISPR-Cas9 for genome engineering. *Cell* 157, 1262–1278.
- El Refaey, M., Xu, L., Gao, Y., Canan, B.D., Adesanya, T.M.A., Warner, S.C., Akagi, K., Symer, D.E., Mohler, P.J., Ma, J., et al. (2017). In Vivo Genome Editing Restores Dystrophin Expression and Cardiac Function in Dystrophic Mice. *Circ. Res.* 121, 923–929.
- Moretti, A., Fonteyne, L., Giesert, F., Hoppmann, P., Meier, A.B., Bozoglu, T., Baehr, A., Schneider, C.M., Sinnecker, D., Klett, K., et al. (2020). Somatic gene editing ameliorates skeletal and cardiac muscle failure in pig and human models of Duchenne muscular dystrophy. *Nat. Med.* 26, 207–214.
- McGreevy, J.W., Hakim, C.H., McIntosh, M.A., and Duan, D. (2015). Animal models of Duchenne muscular dystrophy: from basic mechanisms to gene therapy. *Dis. Model. Mech.* 8, 195–213.

28. Wasala, N.B., Chen, S.J., and Duan, D. (2020). Duchenne muscular dystrophy animal models for high-throughput drug discovery and precision medicine. *Expert Opin. Drug Discov.* *15*, 443–456.
29. 't Hoen, P.A.C., de Meijer, E.J., Boer, J.M., Vossen, R.H.A.M., Turk, R., Maatman, R.G.H.J., Davies, K.E., van Ommen, G.J., van Deutekom, J.C., and den Dunnen, J.T. (2008). Generation and characterization of transgenic mice with the full-length human DMD gene. *J. Biol. Chem.* *283*, 5899–5907.
30. Young, C.S., Mokhonova, E., Quinonez, M., Pyle, A.D., and Spencer, M.J. (2017). Creation of a Novel Humanized Dystrophic Mouse Model of Duchenne Muscular Dystrophy and Application of a CRISPR/Cas9 Gene Editing Therapy. *J. Neuromuscul. Dis.* *4*, 139–145.
31. Zhang, Y., Li, H., Min, Y.L., Sanchez-Ortiz, E., Huang, J., Mireault, A.A., Shelton, J.M., Kim, J., Mammen, P.P.A., Bassel-Duby, R., and Olson, E.N. (2020). Enhanced CRISPR-Cas9 correction of Duchenne muscular dystrophy in mice by a self-complementary AAV delivery system. *Sci. Adv.* *6*, y6812.
32. Rees, H.A., and Liu, D.R. (2018). Base editing: precision chemistry on the genome and transcriptome of living cells. *Nat. Rev. Genet.* *19*, 770–788.
33. Ryu, S.M., Koo, T., Kim, K., Lim, K., Baek, G., Kim, S.T., Kim, H.S., Kim, D.E., Lee, H., Chung, E., and Kim, J.S. (2018). Adenine base editing in mouse embryos and an adult mouse model of Duchenne muscular dystrophy. *Nat. Biotechnol.* *36*, 536–539.
34. Tabebordbar, M., Zhu, K., Cheng, J.K.W., Chew, W.L., Widrick, J.J., Yan, W.X., Maesner, C., Wu, E.Y., Xiao, R., Ran, F.A., et al. (2016). In vivo gene editing in dystrophic mouse muscle and muscle stem cells. *Science* *351*, 407–411.
35. Dangain, J., and Vrbova, G. (1984). Muscle development in mdx mutant mice. *Muscle Nerve* *7*, 700–704.
36. Carnwath, J.W., and Shotton, D.M. (1987). Muscular dystrophy in the mdx mouse: histopathology of the soleus and extensor digitorum longus muscles. *J. Neurol. Sci.* *80*, 39–54.
37. Wang, J.-Z., Wu, P., Shi, Z.-M., Xu, Y.-L., and Liu, Z.-J. (2017). The AAV-mediated and RNA-guided CRISPR/Cas9 system for gene therapy of DMD and BMD. *Brain Dev.* *39*, 547–556.
38. Lau, C.-H., and Suh, Y. (2017). *In vivo* genome editing in animals using AAV-CRISPR system: applications to translational research of human disease. *F1000Res.* *6*, 2153.
39. Mendell, J.R., Al-Zaidy, S., Shell, R., Arnold, W.D., Rodino-Klapac, L.R., Prior, T.W., Lowes, L., Alfano, L., Berry, K., Church, K., et al. (2017). Single-Dose Gene-Replacement Therapy for Spinal Muscular Atrophy. *N. Engl. J. Med.* *377*, 1713–1722.
40. Zincarelli, C., Soltys, S., Rengo, G., and Rabinowitz, J.E. (2008). Analysis of AAV serotypes 1–9 mediated gene expression and tropism in mice after systemic injection. *Mol. Ther.* *16*, 1073–1080.
41. Büning, H., Perabo, L., Coutelle, O., Quadt-Humme, S., and Hallek, M. (2008). Recent developments in adeno-associated virus vector technology. *J. Gene Med.* *10*, 717–733.
42. Martari, M., Sagazio, A., Mohamadi, A., Nguyen, Q., Hauschka, S.D., Kim, E., and Salvatori, R. (2009). Partial rescue of growth failure in growth hormone (GH)-deficient mice by a single injection of a double-stranded adeno-associated viral vector expressing the GH gene driven by a muscle-specific regulatory cassette. *Hum. Gene Ther.* *20*, 759–766.
43. Schmidt, F., Beaudouin, J., Börner, K., and Grimm, D. (2015). 117. AAV-TRISPR – A Novel Versatile AAV Vector Kit for Combinatorial CRISPR and RNAi Expression. *Mol. Ther.* *23* (Suppl. 1), S48–S49.
44. Findlay, A.R., Wein, N., Kaminoh, Y., Taylor, L.E., Dunn, D.M., Mendell, J.R., King, W.M., Pestronk, A., Florence, J.M., Mathews, K.D., et al.; United Dystrophinopathy Project (2015). Clinical phenotypes as predictors of the outcome of skipping around DMD exon 45. *Ann. Neurol.* *77*, 668–674.
45. Long, C., Li, H., Tiburcy, M., Rodriguez-Caycedo, C., Kyrchenko, V., Zhou, H., Zhang, Y., Min, Y.-L., Shelton, J.M., Mammen, P.P.A., et al. (2018). Correction of diverse muscular dystrophy mutations in human engineered heart muscle by single-site genome editing. *Sci. Adv.* *4*, eaap9004.
46. Brinkman, E.K., Chen, T., Amendola, M., and van Steensel, B. (2014). Easy quantitative assessment of genome editing by sequence trace decomposition. *Nucleic Acids Res.* *42*, e168.
47. Grieger, J.C., Choi, V.W., and Samulski, R.J. (2006). Production and characterization of adeno-associated viral vectors. *Nat. Protoc.* *1*, 1412–1428.
48. Burridge, P.W., Matsa, E., Shukla, P., Lin, Z.C., Churko, J.M., Ebert, A.D., Lan, F., Diecke, S., Huber, B., Mordwinkin, N.M., et al. (2014). Chemically defined generation of human cardiomyocytes. *Nat. Methods* *11*, 855–860.

**YMTHE, Volume 28**

## **Supplemental Information**

### **Correction of Three Prominent Mutations in Mouse and Human Models of Duchenne Muscular Dystrophy by Single-Cut Genome Editing**

**Yi-Li Min, Francesco Chemello, Hui Li, Cristina Rodriguez-Caycedo, Efrain Sanchez-Ortiz, Alex A. Mireault, John R. McAnally, John M. Shelton, Yu Zhang, Rhonda Bassel-Duby, and Eric N. Olson**

# Supplemental Information

## Supplementary Figures

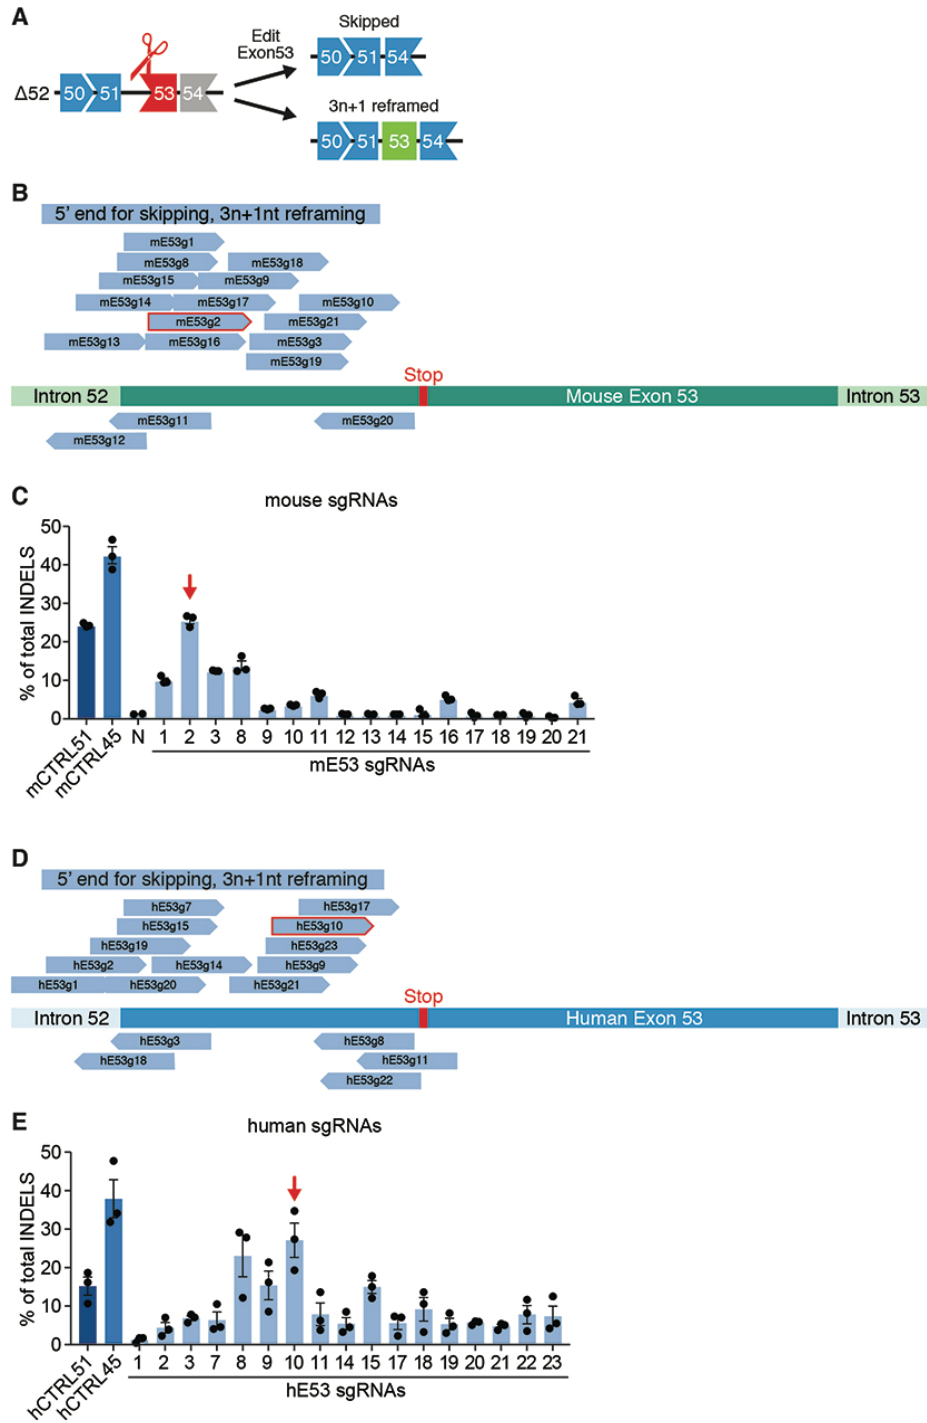

**Figure S1. Gene editing strategy and location of mouse and human exon 53 sgRNAs for  $\Delta 52$  DMD models.** (A) Diagram for exon 53 targeting strategy and potential products after editing. Shapes of intron-exon junctions indicate complementarity that maintains the open reading frame upon splicing. (B) Mouse sgRNA location targeting the 5' region of exon 53. The sgRNAs targeting exon 53 before the stop codon in  $\Delta 52$  mice are candidates for exon skipping or 3n+1 reframing. sgRNA sequences are listed in Table S2. mE53g2, the sgRNA selected for further analyses is bordered in red. (C) Indel analysis of sgRNAs that target exon 53 was performed in N2a mouse cells. Red arrow indicates the most efficient sgRNA which was used for further analyses. mCTRL51 and mCTRL45 are positive validated sgRNA controls targeting mouse exon 51 and exon 45, respectively<sup>18, 19</sup> (n = 3 biological replicates). (D) Human sgRNA location for targeting the 5' region of exon 53. The sgRNAs targeting exon 53 before the stop codon in human  $\Delta 52$  iPSCs are candidates for exon skipping or 3n+1 reframing. sgRNA sequences are listed in Table S2. hE53h10, the sgRNA selected for further analyses is bordered in red. (E) Indel analysis of sgRNAs that target exon 53 was performed in 293T human cells. Red arrow indicates the most efficient sgRNA used for further analyses. hCTRL51 and hCTRL45 are positive validated sgRNA controls targeting human exon 51 and exon 45, respectively<sup>18, 19</sup> (n = 3 biological replicates). Data are presented as means  $\pm$  SEM.

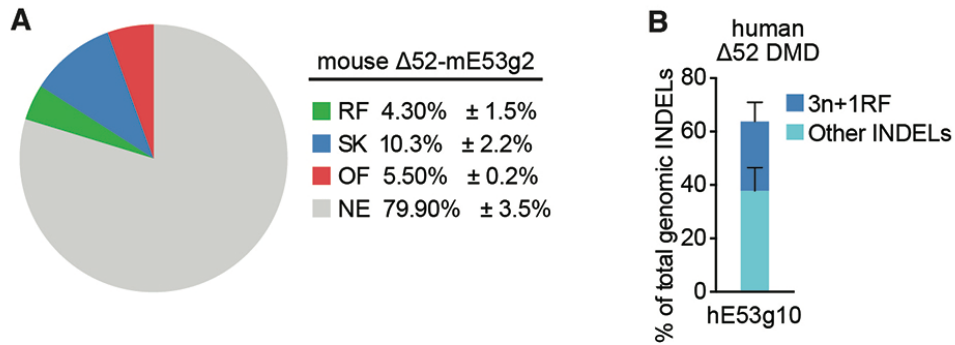

**Figure S2. Correction events of mouse and human models after editing of exon 53 in mouse and human  $\Delta 52$  DMD models.** (A) Pie chart showing percentage of events detected in mouse TA muscle at exon 53 after ssAAV-Cas9 and scAAV-mE53g2 treatment using TIDE analysis of the RT-PCR sequences (n=3). RT-PCR products were divided into four groups: Not edited (NE), exon 53 skipped (SK), exon 53 reframed (RF), and out of frame (OF). (B) INDEL genomic analysis of hE53g10 targeting exon 53 in human  $\Delta 52$  DMD iPSCs (n=3). 3n+1 reframing (RF) events restore the correct open reading frame. Data are presented as means  $\pm$  SEM



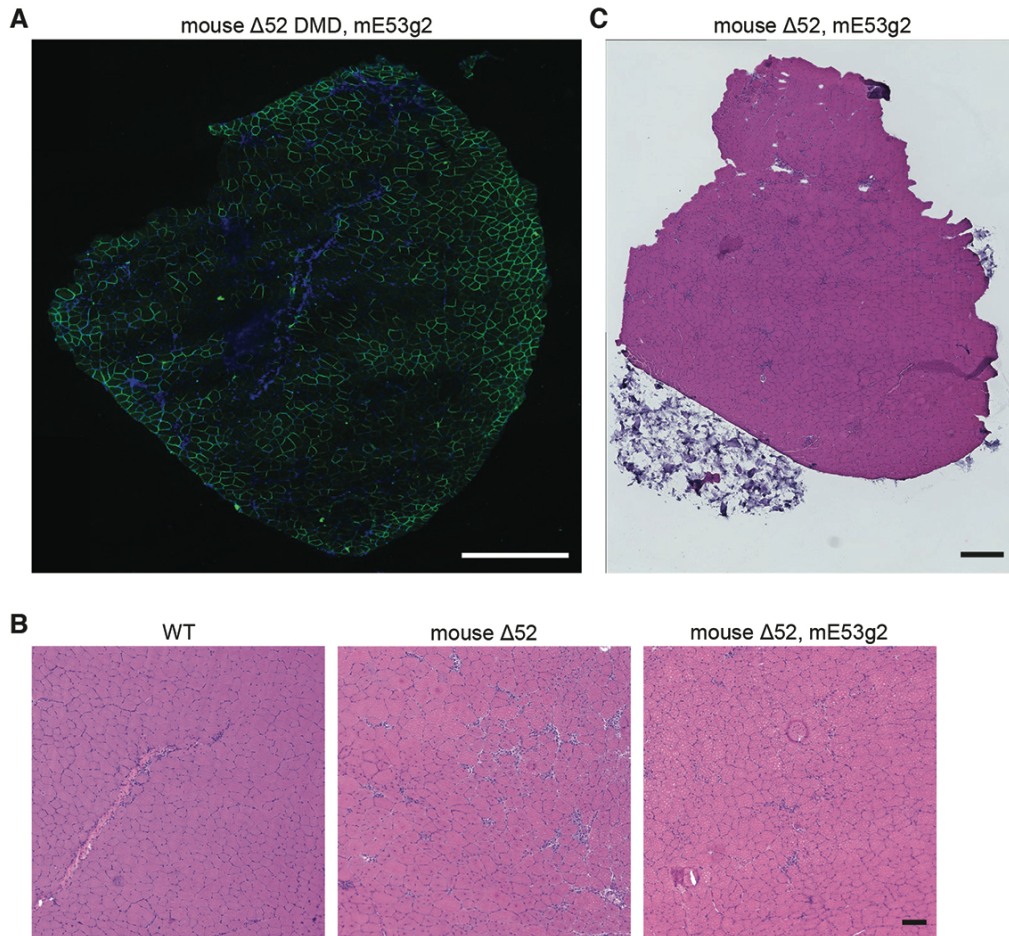

**Figure S3. Intramuscular AAV9 delivery of gene editing components rescues dystrophin expression in  $\Delta 52$  DMD mice.** (A) Dystrophin immunohistochemistry of TA muscle in corrected  $\Delta 52$  DMD mice 3 weeks after ssAAV-Cas9 and scAAV-mE53g2 intramuscular injection ( $5 \times 10^{10}$  vg/leg of ssAAV9-Cas9 and  $5 \times 10^{10}$  vg/leg of scAAV-mE53g2). Dystrophin is shown in green. Nuclei are marked by DAPI stain in blue. Tile scan (10X) of the entire TA muscle. Scale bar is 500  $\mu\text{m}$ . (B) H&E staining of TA in WT,  $\Delta 52$  DMD, and corrected  $\Delta 52$  DMD mice 3 weeks after ssAAV-Cas9 and scAAV-mE53g2 intramuscular injection ( $5 \times 10^{10}$  vg/leg of ssAAV9-Cas9 and  $5 \times 10^{10}$  vg/leg of scAAV-mE53g2). Scale bar is 100  $\mu\text{m}$ . (C) Whole muscle scanning of H&E staining of TA of WT,  $\Delta 52$  DMD and corrected  $\Delta 52$ . Tile scan (4X) of the entire muscle. Scale bar is 500  $\mu\text{m}$ .

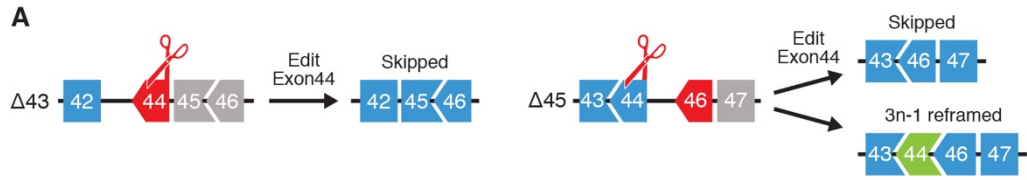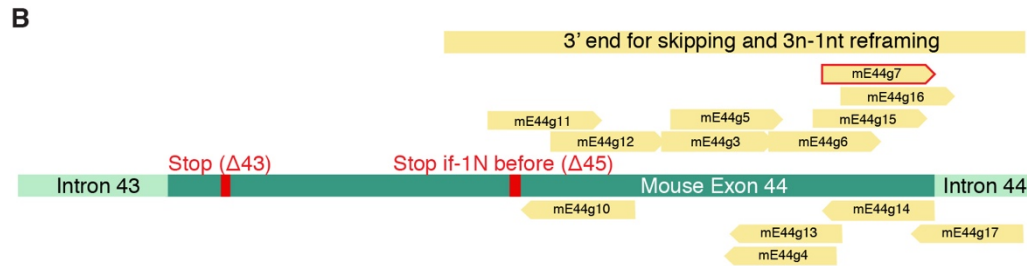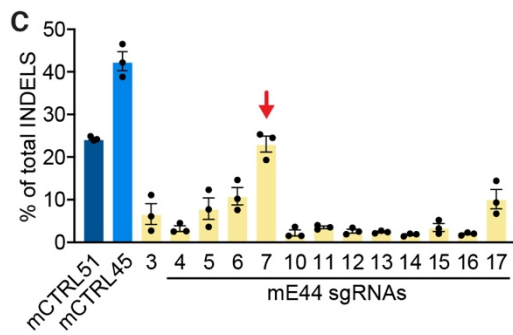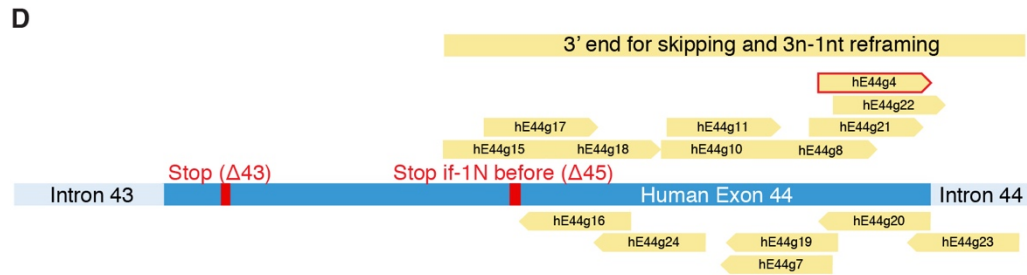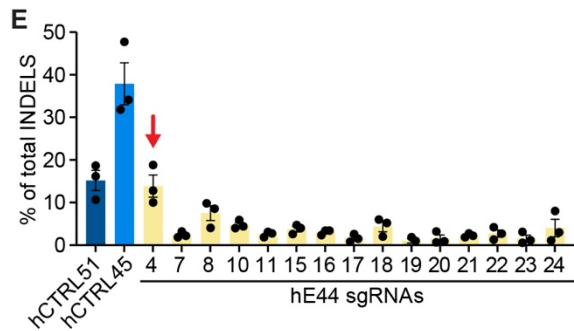

**Figure S4. Gene editing strategy and location of mouse and human exon 44 sgRNAs for  $\Delta 43$  and  $\Delta 45$  DMD models.** (A) Diagram for exon 44 targeting strategy and potential products after editing in  $\Delta 43$  and  $\Delta 45$  DMD models. Shapes of intron-exon junctions indicate complementarity that maintains the open reading frame upon splicing. (B) Mouse sgRNAs targeting the 3' region of exon 44. The sgRNAs targeting exon 44 are candidates for exon skipping (in  $\Delta 43$  DMD mice) or exon skipping and 3n+1 reframing (in  $\Delta 45$  DMD). sgRNA sequences are listed in Table S2. mE44g7, the sgRNA selected for further analyses is bordered in red. (C) Indel analysis of sgRNAs that target exon 44 was performed in N2a mouse cells. Red arrow indicates the most efficient sgRNA which was used for further analyses. mCTRL51 and mCTRL45 are positive validated sgRNA controls targeting, respectively, mouse exon 51 and exon 45<sup>18, 19</sup> (n = 3 biological replicates). (D) Human sgRNA location for targeting the 3' region of exon 44. The sgRNAs targeting exon 44 are candidates for exon skipping (in human  $\Delta 43$  DMD) or exon skipping and 3n+1 reframing (in human  $\Delta 45$  DMD). sgRNA sequences are listed in Table S2. hE44g4, the sgRNA selected for further analyses is bordered in red. (E) Indel analysis of sgRNAs that target exon 44 was performed in 293T human cells. Red arrow indicates the most efficient sgRNA used for the further analyses. hCTRL51 and hCTRL45 are positive validated sgRNA controls targeting, respectively, human exon 51 and exon 45<sup>18, 19</sup> (n = 3 biological replicates). Data are presented as means  $\pm$  SEM

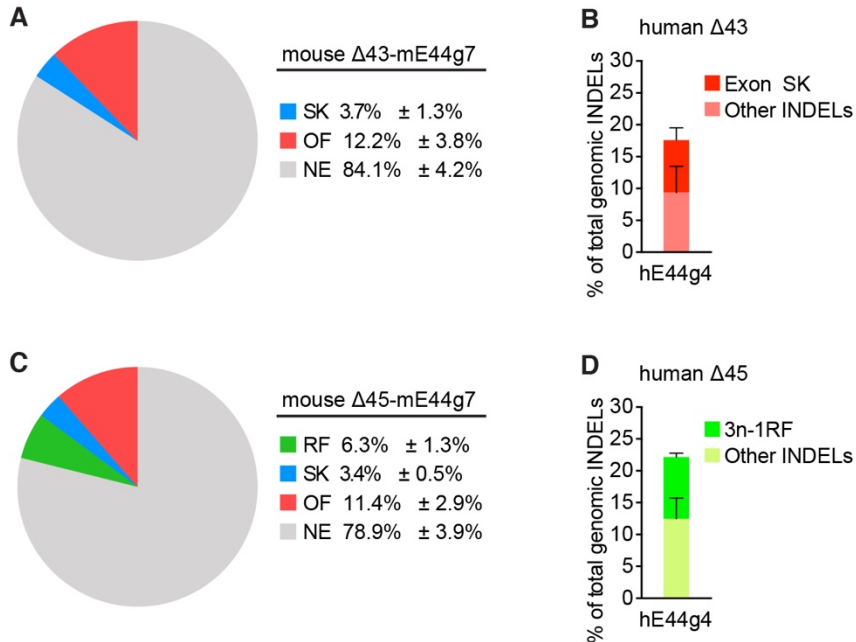

**Figure S5. Correction events after gene editing of exon 44 in mouse and human  $\Delta 43$  and  $\Delta 45$  DMD models.** (A, C) Pie charts showing percentage of events detected in  $\Delta 43$  and  $\Delta 45$  DMD mouse TA muscles after ssAAV-Cas9 and scAAV-mE44g7 treatment using TIDE analysis of the RT-PCR sequences (A: n=3; C: n=2). RT-PCR products were divided into four groups: Not edited (NE), exon 44 skipped (SK), exon 44 reframed (RF), and out of frame (OF). (B, D) INDEL genomic analysis of hE44g4 targeting exon 44 in human  $\Delta 43$  and  $\Delta 45$  DMD iPSCs (n=3). Exon 44 skipping (SK) restores the correct open reading frame in human  $\Delta 43$  DMD. 3n-1 reframing (RF) events restore the correct open reading frame in  $\Delta 45$ . Data are presented as means  $\pm$  SEM

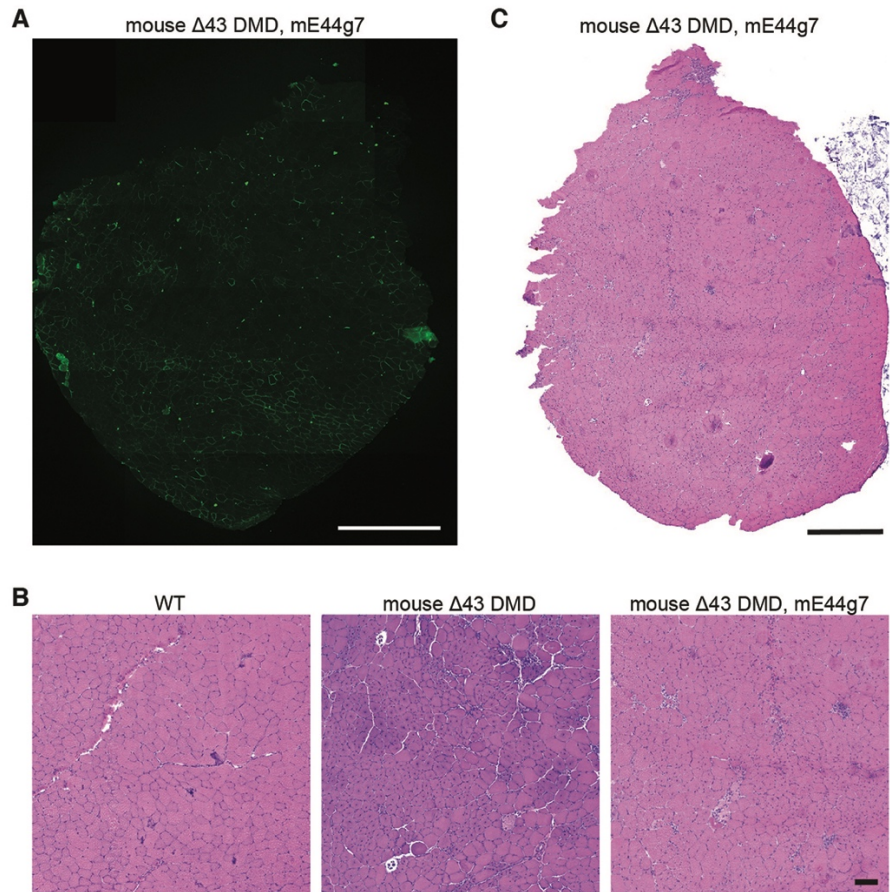

**Figure S6. Intramuscular AAV9 delivery of gene editing components restores dystrophin expression in  $\Delta 43$  DMD mice.** (A) Dystrophin immunohistochemistry of TA muscle in corrected  $\Delta 43$  DMD mice 3 weeks after ssAAV-Cas9 and scAAV-mE44g7 intramuscular injection ( $5 \times 10^{10}$  vg/leg of ssAAV9-Cas9 and  $5 \times 10^{10}$  vg/leg of scAAV-mE44g7). Dystrophin is shown in green. Nuclei are marked by DAPI stain in blue. Tile scan (10X) of the entire TA muscle. Scale bar is 500  $\mu\text{m}$ . (B) H&E staining of TA muscles in WT,  $\Delta 43$  DMD, and corrected  $\Delta 43$  mice 3 weeks after ssAAV-Cas9 and scAAV-mE44g7 intramuscular injection ( $5 \times 10^{10}$  vg/leg of ssAAV9-Cas9 and  $5 \times 10^{10}$  vg/leg of scAAV-mE44g7). Scale bar is 100  $\mu\text{m}$ . (C) Whole muscle scanning of H&E staining of TA of corrected m $\Delta 43$ . Tile scan (4X) of the entire muscle. Scale bar is 500  $\mu\text{m}$ .

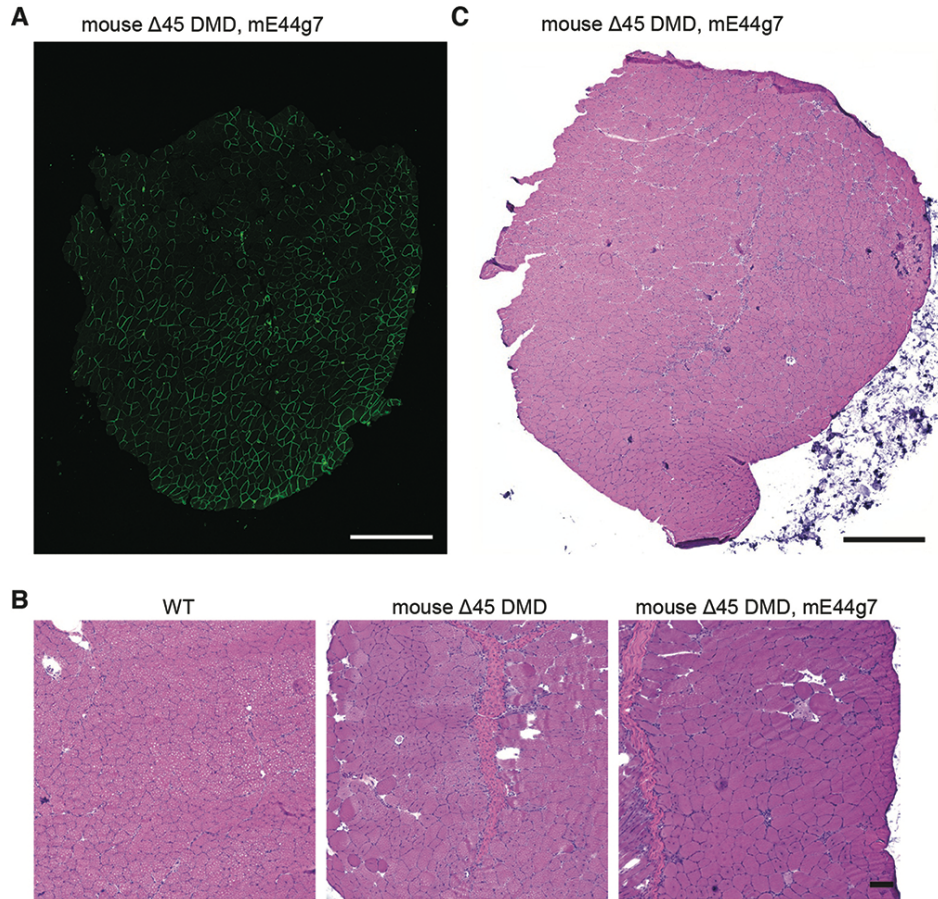

**Figure S7. Intramuscular AAV9 delivery of gene editing components restores dystrophin expression in  $\Delta 45$  DMD mice.** (A) Dystrophin immunohistochemistry of TA muscle in corrected  $\Delta 45$  DMD mice 3 weeks after ssAAV-Cas9 and scAAV-mE44g7 intramuscular injection ( $5 \times 10^{10}$  vg/leg of ssAAV9-Cas9 and  $5 \times 10^{10}$  vg/leg of scAAV-mE44g7). Dystrophin is shown in green. Nuclei are marked by DAPI stain in blue. Tile scan (10X) of the entire TA muscle. Scale bar is 500  $\mu$ m. (B) H&E staining of TA in WT,  $\Delta 45$  DMD, and corrected DMD mice 3 weeks after ssAAV-Cas9 and scAAV-mE44g7 intramuscular injection ( $5 \times 10^{10}$  vg/leg of ssAAV9-Cas9 and  $5 \times 10^{10}$  vg/leg of scAAV-mE44g7). Scale bar is 100  $\mu$ m. (C) Whole muscle scanning of H&E staining of TA muscles of corrected  $\Delta 45$  DMD mice. Tile scan (4X) of the entire muscle. Scale bar is 500  $\mu$ m.

## Supplementary Tables

**Table S1. List of sgRNAs used to generate DMD mouse models and primers.**

| DMD model generation                                                            |                       |                              |
|---------------------------------------------------------------------------------|-----------------------|------------------------------|
| Purpose of the primers                                                          | ID                    | Sequence (5'-3')             |
| Primers for sgRNA targeting Dmd exon 43 to generate the $\Delta$ Ex43 DMD model | mDmd-Ex43-N2-Top      | caccgTTATTAGTACTAACTCAGAA    |
|                                                                                 | mDmd-Ex43-N2-Bottom   | aaacTTCTGAGTTAGTACTAATAAc    |
|                                                                                 | mDmd-Ex43-C2-Top      | caccgGTAAATATCAACTTCTAAAT    |
|                                                                                 | mDmd-Ex43-C2-Bottom   | aaacATTTAGAAAGTTGATATTTACc   |
| Primers for sgRNA targeting Dmd exon 45 to generate the $\Delta$ Ex45 DMD model | mDmd-Exon45-5-G1-top  | CACCGaactaatatatacctaaataact |
|                                                                                 | mDmd-Exon45-5-G1-bot  | AAACAGTATTTGGATATATTAGTT C   |
|                                                                                 | mDmd-Exon45-3-G4-top  | CACCGagtttggtgctaaaaatcatg   |
|                                                                                 | mDmd-Exon45-3-G4-bot  | AAACCATGATTTTTTAGCACAAACT C  |
| Primers for sgRNA targeting Dmd exon 52 to generate the $\Delta$ Ex52 DMD model | mDmd-Ex52-N1-Top      | CACCGatataatcttaaatgatgtat   |
|                                                                                 | mDmd-Ex52-N1-bottom   | AAACATACATCATTTAAGATATATC    |
|                                                                                 | mDmd-Ex52-C3-Top      | caccgccaagttaatcaaattggttc   |
|                                                                                 | mDmd-Ex52-C3-Bottom   | aaacGAACAATTTGATTAACCTGGc    |
| PCR, RT-PCR and TIDE analysis                                                   |                       |                              |
| For mouse dE43, skipping exon 44                                                | mDmd-dE43-E4146-RT-R2 | CTGCTGCTCATCTCCAAGTG         |
|                                                                                 | mDmd-dE43-E4246-RT-F3 | AGTGACGACTGAAGATATGCCT       |
| For mouse dE45, skipping/reframing exon44                                       | mDmd-E4347-RT-F2      | AGGTGAAAGTACAGGAAGCCGT       |
|                                                                                 | mDmd-E4347-RT-R2      | CTTCTGGCCTTATGGGAGCACT       |
| For mouse dE52, skipping or reframe exon 53                                     | mDmd-E5054-RT-R1      | TGACGGAGGTCTTTGGCCAA         |
|                                                                                 | mDmd-E5155-RT-F1      | TTGGAGGTACCTGCACTGGC         |
| For human dE43, skipping exon 44                                                | hEx42-RT-F            | GCCCTATTAGAAGTGAACAAC        |
|                                                                                 | hEx46-RT-R            | GGTTCAGTGGGATACTAGC          |
| For human dE45, skipping/reframing exon44                                       | hEx42-RT-F            | GCCCTATTAGAAGTGAACAAC        |
|                                                                                 | hEx46-RT-R            | GGTTCAGTGGGATACTAGC          |
| For human dE52, skipping or reframe exon 53                                     | hEx51-RT-F            | GAAACTGCCATCTCCAAACTAGAAA    |
|                                                                                 | hEx54-RT-R            | TCATGTGGACTTTTCTGGTATCATC    |
| For editing mouse Dmd exon 44                                                   | mE44-T7E1-F1          | agggagaagatgctaattatcctaag   |
|                                                                                 | mE44-T7E1-R1          | caaacagtcatagcacaattttcag    |
| For editing mouse Dmd exon 46                                                   | mDmd-sE46-T7E1-F2     | tcttcacaagccccctctta         |
|                                                                                 | mDmd-sE46-T7E1-R1     | Caactggtaggcagtttgcatt       |
| For editing mouse Dmd exon 53                                                   | mDmd-sE53-T7E1-F2     | TGCCACAAGTAAGTGCTGA          |
|                                                                                 | mDmd-sE53-T7E1-R1     | TTGTCTCAAaaccaaccaacc        |
|                                                                                 | hDMD-sE53-T7E1-F1     | gggaaatcaggctgatgggt         |

|                           |                   |                           |
|---------------------------|-------------------|---------------------------|
| For editing human exon 53 | hDMD-sE53-T7E1-R1 | GTCTACTGTTTCATTTTCAGC     |
| For editing human exon 44 | hDMD-sE44-T7E1-F2 | GCAGGAAACTATCAGAGTG       |
|                           | hDMD-sE44-T7E1-R2 | ACACCTTGCTGTTACGAT        |
| For editing human exon 46 | hDMD-sE46-T7E1-F1 | ccaccaaacctggcaaat        |
|                           | hDMD-sE46-T7E1-R1 | GAACTATGAATAACCTAATGGGCAG |



**Table S2. Sequence of sgRNAs.**

| Purpose                       | ID                   | Sequence              | PAM |
|-------------------------------|----------------------|-----------------------|-----|
| Human sgRNA targeting exon 53 | hE53g1               | ATTTATTTTCCTTTTATTC   | TAG |
|                               | hE53g2               | TTTCCTTTTATTCTAGTTGA  | AAG |
|                               | hE53g3               | TGATTCTGAATTCTTTCAAC  | TAG |
|                               | hE53g7               | TGAAAGAATTCAGAATCAGT  | GGG |
|                               | hE53g8               | ACTGTTGCCTCCGGTTCTGA  | AGG |
|                               | hE53g9               | TACAAGAACACCTTCAGAAC  | CGG |
|                               | hE53g10              | AAGAACACCTTCAGAACCGG  | AGG |
|                               | hE53g11              | TTTCATTCAACTGTTGCCTC  | CGG |
|                               | hE53g14              | AATTCAGAATCAGTGGGATG  | AAG |
|                               | hE53g15              | TTGAAAGAATTCAGAATCAG  | TGG |
|                               | hE53g17              | ACCTTCAGAACCGGAGGCAA  | CAG |
|                               | hE53g18              | AATTCTTTCAAActagaataa | AAG |
|                               | hE53g19              | ttattctagTTGAAAGAATT  | CAG |
|                               | hE53g20              | tagTTGAAAGAATTCAGAAT  | CAG |
|                               | hE53g21              | ATGAAGTACAAGAACACCTT  | CAG |
|                               | hE53g22              | AACTGTTGCCTCCGGTTCTG  | AAG |
| hE53g23                       | CAAGAACACCTTCAGAACCG | GAG                   |     |
| Human sgRNA targeting exon 44 | hE44g4               | TAAATACAAATGGTATCTTA  | AGG |
|                               | hE44g7               | TTAGCATGTTCCCAATTCTC  | AGG |
|                               | hE44g8               | GGGAACATGCTAAATACAAA  | TGG |
|                               | hE44g10              | AGACACAAATTCCTGAGAAT  | TGG |
|                               | hE44g11              | GACACAAATTCCTGAGAATT  | GGG |
|                               | hE44g15              | ATTTAATCAGTGGCTAACAG  | AAG |
|                               | hE44g16              | AGAACTGTTCAGCTTCTGT   | TAG |
|                               | hE44g17              | AGTGGCTAACAGAAGCTGAA  | CAG |
|                               | hE44g18              | AAGCTGAACAGTTTCTCAGA  | AAG |
|                               | hE44g19              | TTTAGCATGTTCCCAATTCT  | CAG |
|                               | hE44g20              | CTTAAGATACCATTTGTATT  | TAG |
|                               | hE44g21              | CTAAATACAAATGGTATCTT  | AAG |
|                               | hE44g22              | TACAAATGGTATCTTAAGgt  | aag |
|                               | hE44g23              | acaaatcaaagacttacCTT  | AAG |
| hE44g24                       | TGTCTTTCTGAGAACTGTT  | CAG                   |     |
| Control sgRNAs                | hCTRL1               | CACCAGAGTAACAGTCTGAG  | TAG |
|                               | hCTRL2               | ATCTTACAGGAACTCCAGGA  | TGG |
|                               | mCTRL1               | CACTAGAGTAACAGTCTGAC  | TGG |
|                               | mCTRL2               | GGCTTACAGGAACTCCAGGA  | TGG |
| Mouse sgRNA targeting exon 53 | mE53g1               | TGAAAGAATTCAGATTCAGT  | GGG |
|                               | mE53g2               | AATTCAGATTCAGTGGGATG  | AGG |

|                                                                                      |         |                       |     |
|--------------------------------------------------------------------------------------|---------|-----------------------|-----|
|                                                                                      | mE53g3  | TTCAAGAACAGCTGCAGAAC  | AGG |
|                                                                                      | mE53g8  | TTGAAAGAATTCAGATTCAG  | TGG |
|                                                                                      | mE53g9  | AGTGGGATGAGGTTCAAGAA  | CAG |
|                                                                                      | mE53g10 | AGCTGCAGAACAGGAGACAA  | CAG |
|                                                                                      | mE53g11 | TGAATCTGAATTCTTTCAAC  | TGG |
|                                                                                      | mE53g12 | CTTTCAACTGGAATAAAAAAT | AAG |
|                                                                                      | mE53g13 | CTTATTTTTATTCCAGTTGA  | AAG |
|                                                                                      | mE53g14 | TTATTCCAGTTGAAAGAATT  | CAG |
|                                                                                      | mE53g15 | CAGTTGAAAGAATTCAGATT  | CAG |
|                                                                                      | mE53g16 | GAATTCAGATTCAGTGGGAT  | GAG |
|                                                                                      | mE53g17 | GATTCAGTGGGATGAGGTTT  | AAG |
|                                                                                      | mE53g18 | ATGAGGTTCAAGAACAGCTG  | CAG |
|                                                                                      | mE53g19 | GTTCAAGAACAGCTGCAGAA  | CAG |
|                                                                                      | mE53g20 | AACTGTTGTCTCCTGTTCTG  | CAG |
|                                                                                      | mE53g21 | CAAGAACAGCTGCAGAACAG  | GAG |
| Mouse sgRNA targeting exon 44                                                        | mE44g3  | AGACACAAAATCCTGAAAAC  | TGG |
|                                                                                      | mE44g4  | TTAGCATGTTCCAGTTTTT   | AGG |
|                                                                                      | mE44g5  | GACACAAAATCCTGAAAAC   | GGG |
|                                                                                      | mE44g6  | GGGAACATGCTAAATACAAA  | TGG |
|                                                                                      | mE44g7  | TAAATACAAATGGTATCTTA  | AGG |
|                                                                                      | mE44g10 | AAAAACTGTTCAACTTCATT  | CAG |
|                                                                                      | mE44g11 | AATGGCTGAATGAAGTTGAA  | CAG |
|                                                                                      | mE44g12 | AAGTTGAACAGTTTTTCAA   | AAG |
|                                                                                      | mE44g13 | TTTAGCATGTTCCAGTTTT   | CAG |
|                                                                                      | mE44g14 | CTTAAGATACCATTTGTATT  | TAG |
|                                                                                      | mE44g15 | CTAAATACAAATGGTATCTT  | AAG |
|                                                                                      | mE44g16 | TACAAATGGTATCTTAAGgt  | AAG |
|                                                                                      | mE44g17 | AAATCTCAAAGTCTTACCTT  | AAG |
| sgRNAs with NGG PAM are marked in green and sgRNAs with NAG PAM are marked in black. |         |                       |     |
